# Supplementary material for: V-Doping coupled H2O2 pre-oxidation synergistically promote NiCo-LDH for urea oxidation-assisted hydrogen production
Source: Royal Society of Chemistry journal article supplement (doi:10.1039/d4ta01763c), 2024-01-01
Supplement: d4ta01763c1.pdf [file d4ta01763c1.pdf]

## Supporting Information

### **V doping coupled H<sub>2</sub>O<sub>2</sub> pre-oxidation synergistically promote NiCo-LDH for urea oxidation assisted hydrogen production**

Jiawei Guo, Heng Zhang, Yusen Yang, Min Wei, Hui Zhang\*

State Key Laboratory of Chemical Resource Engineering, Beijing University of Chemical  
Technology, Beijing 100029, China.

\*Corresponding author: Hui Zhang

Tel.: +8610 64425872;

Fax: +8610 64425385;

E-mail: zhanghui@mail.buct.edu.cn; huizhang67@gst21.com

## Experiment

### 1. Chemical reagents

The experimental reagents used are all analytically pure, and no further purification is required before use.  $\text{Ni}(\text{NO}_3)_2 \cdot 6\text{H}_2\text{O}$ ,  $\text{Co}(\text{NO}_3)_2 \cdot 6\text{H}_2\text{O}$ ,  $\text{VCl}_3$ ,  $\text{CO}(\text{NH}_2)_2$ ,  $\text{H}_2\text{O}_2$ ,  $\text{RuO}_2$  and 20% Pt/C were obtained from Aladdin., Acetone ( $\text{C}_3\text{H}_6\text{O}$ ,  $\geq 99.9\%$ ) and ethanol ( $\text{C}_2\text{H}_5\text{OH}$ ,  $\geq 99.9\%$ ) were purchased from Thermo Fisher Scientific, and nickel foam (NF, 95% purity) was purchased from Saibo Company. The NF (cut into a size of  $4\text{ cm} \times 4\text{ cm}$ ) was ultrasonically treated with acetone, 1 M hydrochloric acid, deionized water and absolute ethanol for 15 minutes respectively, to remove oxides on the surface, and then dried at  $80^\circ\text{C}$  in vacuum for 2 h.

### 2. Experimental

#### 2.1 Synthesis of $\text{NiCoV}_x\text{-LDH/NF}$ composites.

$\text{Ni}(\text{NO}_3)_2 \cdot 6\text{H}_2\text{O}$  (1.0 mmol),  $\text{Co}(\text{NO}_3)_2 \cdot 6\text{H}_2\text{O}$  (0.5 mmol),  $\text{VCl}_3$  (0.5 mmol) and  $\text{CO}(\text{NH}_2)_2$  (10 mmol) were dissolved in deionized water (40 mL) and ethanol (40 mL). Then the solution and a clean nickel foam ( $4\text{ cm} \times 4\text{ cm}$ ) were transferred to 100 mL polytetrafluoroethylene lined stainless steel autoclave, and reacted in an oven at  $120^\circ\text{C}$  for 12 h, after natural cooling to room temperature, rinsed with deionized water five times (5 min each time) and freeze-dried to obtain  $\text{NiCoV}_{1.0}\text{-LDH/NF}$  (the mole ratio of V: Co is 1.0). Other catalysts were prepared by controlling the amounts of  $\text{VCl}_3$  (0, 0.25 and 0.75 mmol), and denoted as  $\text{NiCo-LDH/NF}$ ,  $\text{NiCoV}_{0.5}\text{-LDH/NF}$ , and  $\text{NiCoV}_{1.5}\text{-LDH/NF}$ , respectively.

#### 2.2 Synthesis of $\text{NiCoV}_{1.0}\text{-LDH/NF-}y$ composites.

The mixture of  $\text{Ni}(\text{NO}_3)_2 \cdot 6\text{H}_2\text{O}$  (1.0 mmol),  $\text{Co}(\text{NO}_3)_2 \cdot 6\text{H}_2\text{O}$  (0.5 mmol),  $\text{VCl}_3$  (0.5 mmol) and  $\text{CO}(\text{NH}_2)_2$  (10 mmol) was dissolved in deionized water (40 mL) and ethanol (40 mL). A transparent solution was obtained by continuous stirring and ultrasonic dissolution. Then the 3 wt%  $\text{H}_2\text{O}_2$  (100  $\mu\text{L}$ ) is slowly dripped into the above solution. The obtained solution and a clean nickel foam ( $4\text{ cm} \times 4\text{ cm}$ ) were transferred to 100 mL polytetrafluoroethylene lined stainless steel autoclave, and then treated at  $120^\circ\text{C}$  for 12 hours in an oven. After natural cooling to room temperature, the electrocatalyst was obtained by freeze-drying the precipitate, which was cleaned by deionized water for five times (5 min each time) and name as  $\text{NiCoV-LDH/NF-100}$ . Other catalysts were prepared by controlling the addition of  $\text{H}_2\text{O}_2$  (50 and 200  $\mu\text{L}$ ) and were denoted as  $\text{NiCoV}_{1.0}\text{-LDH/NF-50}$  and  $\text{NiCoV}_{1.0}\text{-LDH/NF-200}$ , respectively.

#### 2.3 Synthesis of $\text{NiCoV}_{1.0}\text{-LDH/rGO/NF-100}$ composites.

Firstly, the rGO modified Ni foam (rGO/NF) was pre-prepared by referring to our previous work. <sup>[1-3]</sup> 60

mL of 0.5 mg/mL GO sol was ultrasonicated for 20 min, and then added with 30 mg of citric acid (CA) for further ultrasonication for 5 min to obtain the CA-GO suspension. Subsequently, the obtained CA-GO suspension and two pieces of cleaned NF were placed into a 100 mL autoclave and treated at 120°C for 5 h. Until autoclave cooled off naturally, followed repeatedly rinsed with deionized water to wash away the rGO weakly attached on the surface and in the pores of the NF skeleton, and freeze-dried to obtain rGO/NF. Then, the same volume of the above precursor solution was added to an autoclave containing a piece of rGO/NF, and the reaction was carried out under the same conditions. The obtained product was denoted as NiCoV<sub>1.0</sub>-LDH/rGO/NF-100.

#### **2.4 Commercial catalyst.**

RuO<sub>2</sub> (25 mg) was dispersed in a 1 mL mixed solution (770  $\mu$ L water, 30  $\mu$ L 5 wt % Nafion solution, and 200  $\mu$ L ethanol), followed by sonication to obtain a catalyst ink. The catalyst ink (100  $\mu$ L) was then dropcast on the surface of Ni foam (1 cm  $\times$  1 cm), which was dried at 80°C for 4 h. The catalyst loading was all ca. 2.5 mg cm<sup>-2</sup>.

The 20% Pt/C electrode was prepared by the similar method mentioned above.

### **3. Material Characterization**

The X-ray diffraction (XRD) patterns were recorded on the Shimadzu XRD-6000 diffractometer with Cu-K $\alpha$  radiation ( $\lambda$  = 0.15418 nm, 30 mA, 40 kV) in the 2 $\theta$  scanning range of 3-80°, at a scanning speed of 10°/min. The scanning electron microscope (SEM) images were obtained on Hitachi S-3500N operating at 20 kV. High-resolution transmission electron microscope (HRTEM) images were obtained on JEM 2010 instrument operating at 200 kV. The Raman spectra were obtained with a Jobin Yvon Horiba Raman spectrometer model HR800 using a 532 nm line of Ar<sup>+</sup> ion laser as the excitation source at room temperature. X-ray photoelectron spectroscopy (XPS) was recorded on the VG Escalab-250 (Al K $\alpha$  radiator). Thermogravimetric analysis (TGA) was performed on a Mettler-Toledo TGA/DSC 1/110 ST thermal analyzer, and the sample was heated from 25 to 700 °C under N<sub>2</sub> flow (~50 mL/min). X-ray absorption fine structure spectroscopy (XAFS) was measured at the beamline 1W1B of the Beijing Synchrotron Radiation Facility (BSRF), Institute of High Energy Physics (IHEP), Chinese Academy of Sciences (CAS). XAFS data were collected with an electron beam energy of 2.5 GeV and a beam current of 250 mA with a fixed-exit double-crystal Si(111) monochromator. The raw data were analyzed performed with the IFEFFIT software package, according to standard data analysis procedures.

### **4. Electrochemical characterization**

The electrochemical performance tests in this paper were all completed on the CHI660D electrochemical workstation. The electrolytes used in UOR and HER experiments were 1 M KOH + 0.3 M and 1 M KOH, respectively. In the case of three electrodes, the working electrode was the as-prepared catalyst (the submerged area is 1 cm × 1 cm), and the Hg/HgO electrode was used as the reference electrode. In UOR reaction, the Pt sheet is used as the counter electrode, while in HER reaction, the carbon rod is used as the counter electrode. N<sub>2</sub> must be introduced for 20 min before all tests began, and all potentials were measured according to the Nernst Eq. (S1). and converted to reversible hydrogen electrode.

$$E_{\text{RHE}} = E_{\text{Hg/HgO}} + 0.059 \text{ pH} + 0.098 \text{ V} \quad (\text{S1})$$

The electrocatalytic activity of all electrodes was evaluated using linear sweep voltammetry (LSV) at a scanning rate of 5 mV s<sup>-1</sup>. The Tafel slope is derived from the polarization curve and fitted according to the Eq. (S2):

$$\eta = a + b \log j \quad (\text{S2})$$

Where  $\eta$  is the overpotential,  $j$  is the measured current density,  $b$  is the Tafel slope, and  $a$  is the constant.  $C_{\text{dl}}$  was measured from the double layer charge curve by CV in the small potential range of 0.1 - 0.2 V relative to Hg/HgO electrodes at scan rates of 10, 20, 30, 40 and 50 mV s<sup>-1</sup>. At 0.15 V,  $\Delta j = (j_a - j_c)$  has a linear relation with the scanning rate of Hg/HgO electrode, and the linear slope is twice that of the double layer capacitance. The EIS applies an AC voltage of 5 mV at a frequency of 10 kHz to 0.01 Hz.

The ECSA of the catalyst was calculated according to the following Eq. (S3):

$$\text{ECSA} = C_{\text{dl}}/C_s \quad (\text{S3})$$

where  $C_s$  is specific capacitance in an alkaline electrolyte for Ni foam ( $C_s = 0.040 \text{ mF cm}^{-2}$ ).

In order to further explain the intrinsic activity of the catalysts, the turnover frequency (TOF) at a certain overpotential was calculated according to the Eq. (S4 and S5):

$$\text{UOR: TOF} = \frac{j \times A}{6 \times F \times m} \quad (\text{S4})$$

$$\text{HER: TOF} = \frac{j \times A}{2 \times F \times m} \quad (\text{S5})$$

where  $j$  is current density at a certain overpotential (A cm<sup>-2</sup>),  $A$  is surface area of the working electrode (1 cm<sup>2</sup>),  $F$  is Faraday constant (96485 C mol<sup>-1</sup>) and  $m$  is concentration of active sites in the catalyst (mol cm<sup>-2</sup>).

The Faradaic efficiency (FE) is calculated according to the following relationship:

$$\text{FE} = \frac{2F \times n_{\text{H}_2}}{Q} = \frac{2F \times n_{\text{H}_2}}{It} \quad (\text{S6})$$

Where  $n_{H_2}$  is the amount of hydrogen (mol),  $F$  is the Faraday constant (96500 C/mol),  $Q$  is the total amount of charge passed through the cell (C),  $I$  is the current, and  $t$  is the collection time.

## 5. DFT + U calculation

The present first principle Density functional theory (DFT) calculations are performed by Vienna *Ab initio* Simulation Package (VASP) with the projector augmented wave (PAW) method. The exchange-functional is treated using the generalized gradient approximation (GGA) of Perdew-Burke-Ernzerhof (PBE) functional. The DFT + D3 method developed by Grimme was employed to treat the Van der Waals interactions. The Ueff (U-J) values of 6.2 eV, 3.32 eV and 3.25 eV were applied for Ni, Co and V 3d states. The energy cutoff for the plane wave basis expansion was set to 500 eV and the force on each atom less than 0.05 eV/Å was set for convergence criterion of geometry relaxation. The self-consistent calculations apply a convergence energy threshold of 10<sup>-5</sup> eV. To avoid the periodical interactions, a ~15 Å vacuum space was added in z-direction. The Brillouin zone integration was performed using  $3 \times 3 \times 1$  Monkhorst and Pack  $k$ -point sampling through all the computational process.

The transition state (TS) searches are performed using the Dimer method in the VTST package. The final force on each atom was < 0.05 eV Å<sup>-1</sup>. The TS search is conducted by using the climbing-image nudged elastic band (CI-NEB) method to generate initial guess geometries, followed by the dimer method to converge to the saddle points.

The free energy of the HER step was calculated by the equation:  $\Delta G = \Delta E_{DFT} + \Delta E_{ZPE} - T\Delta S$ , where  $\Delta E_{DFT}$  was the DFT electronic energy difference of each step,  $\Delta E_{ZPE}$  and  $\Delta S$  are the correction of zero-point energy and the variation of entropy, respectively, which were obtained by vibration analysis, T was the temperature (the value here was room temperature).

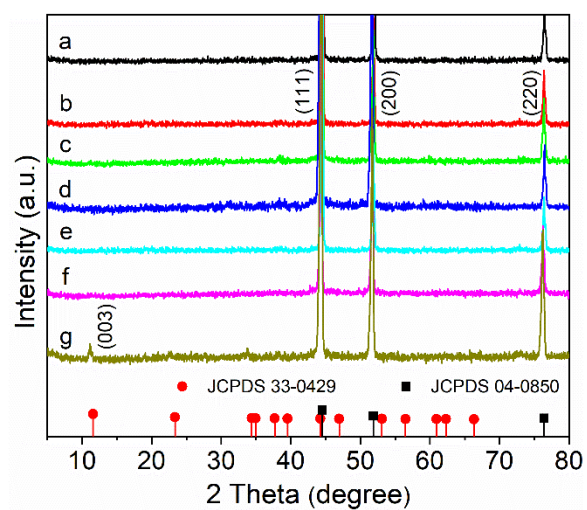

**Fig. S1** XRD patterns of NiCoV<sub>1.0</sub>-LDH/NF- $\gamma$  (a-c:  $\gamma = 50, 100, 200$ ), NiCoV <sub>$x$</sub> -LDH/NF (d-f:  $x = 0.5, 1.0, 1.5$ ) and NiCo-LDH/NF (g) composites.

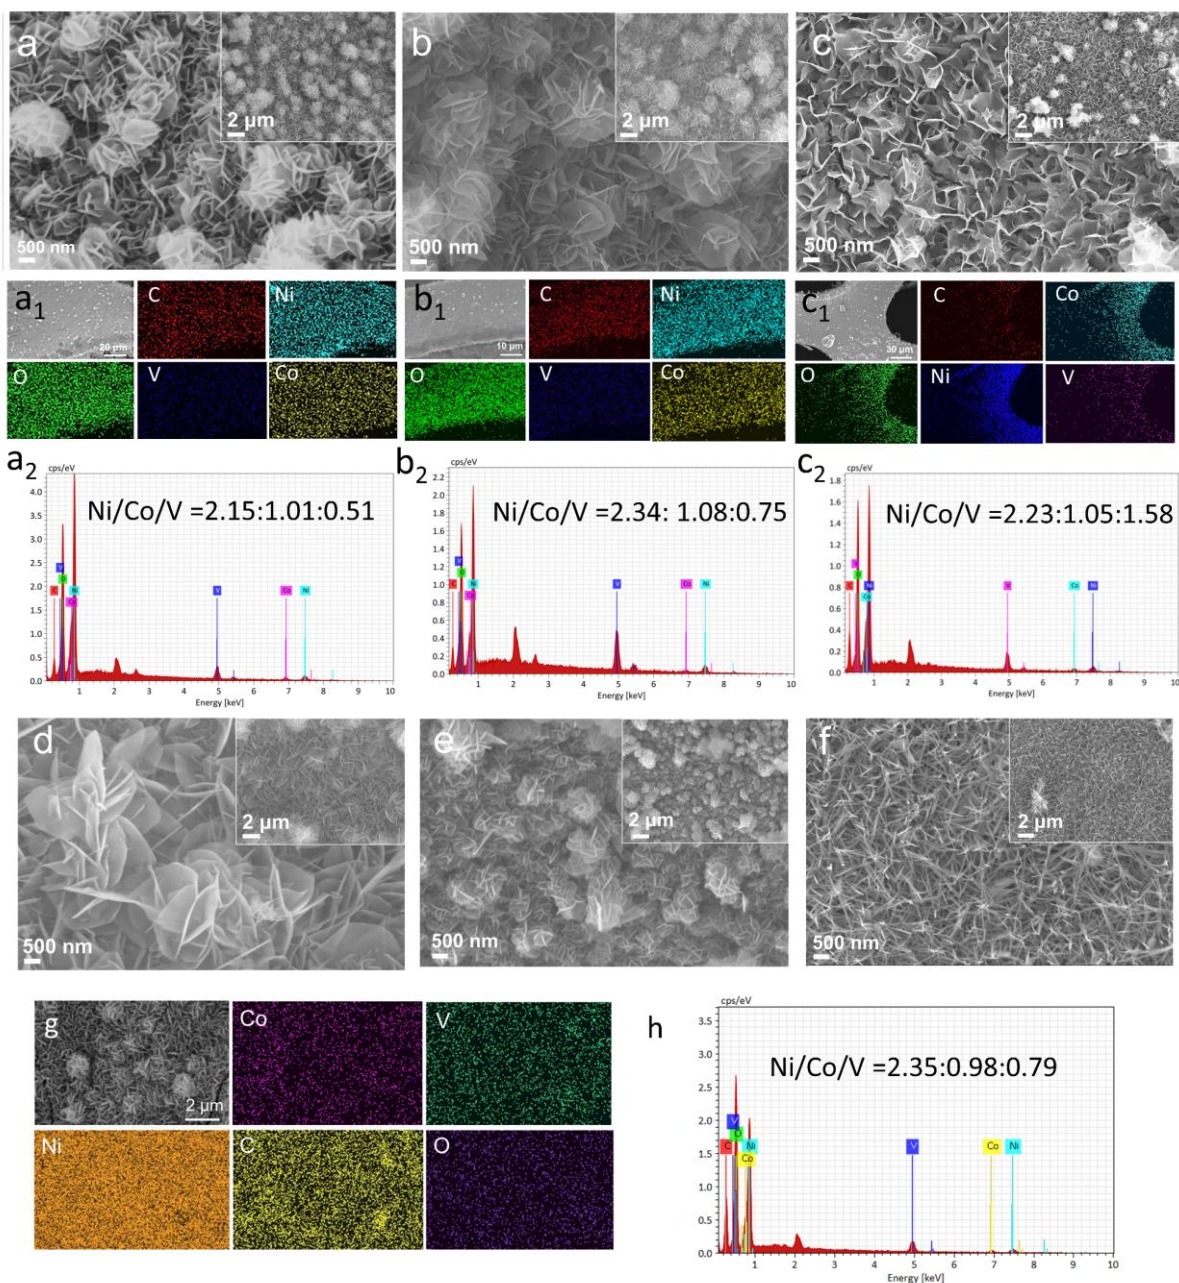

**Fig. S2** SEM images (a-c), SEM-EDX elemental mappings (a<sub>1</sub>-c<sub>1</sub>) and SEM-EDS spectra (a<sub>2</sub>-c<sub>2</sub>) of NiCoV<sub>x</sub>-LDH/NF (a-c:  $x = 0.5, 1.0, 1.5$ ). SEM images of NiCoV<sub>1.0</sub>-LDH/NF- $y$  (d, e:  $y = 50, 200$ ) and NiCo-LDH/NF (f). SEM-EDX elemental mapping (g) and SEM-EDS spectrum (h) of NiCoV<sub>1.0</sub>-LDH/NF-100.

S

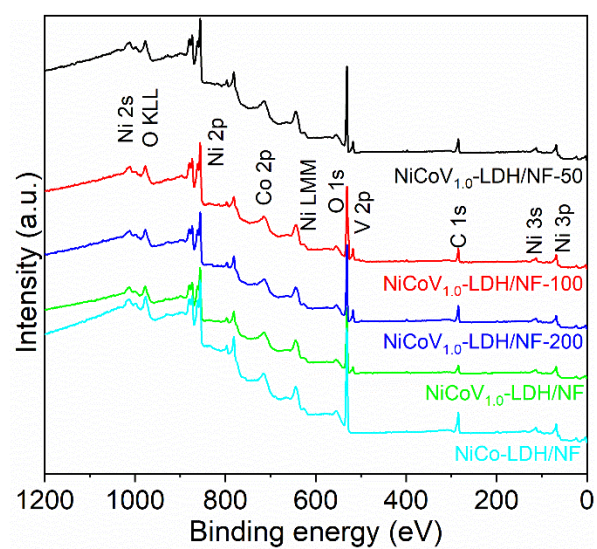

**Fig. S3** Full XPS survey spectra of NiCoV<sub>1.0</sub>-LDH/NF- $\gamma$  ( $\gamma = 50, 100, 200$ ), NiCoV<sub>1.0</sub>-LDH/NF and NiCo-LDH/NF.

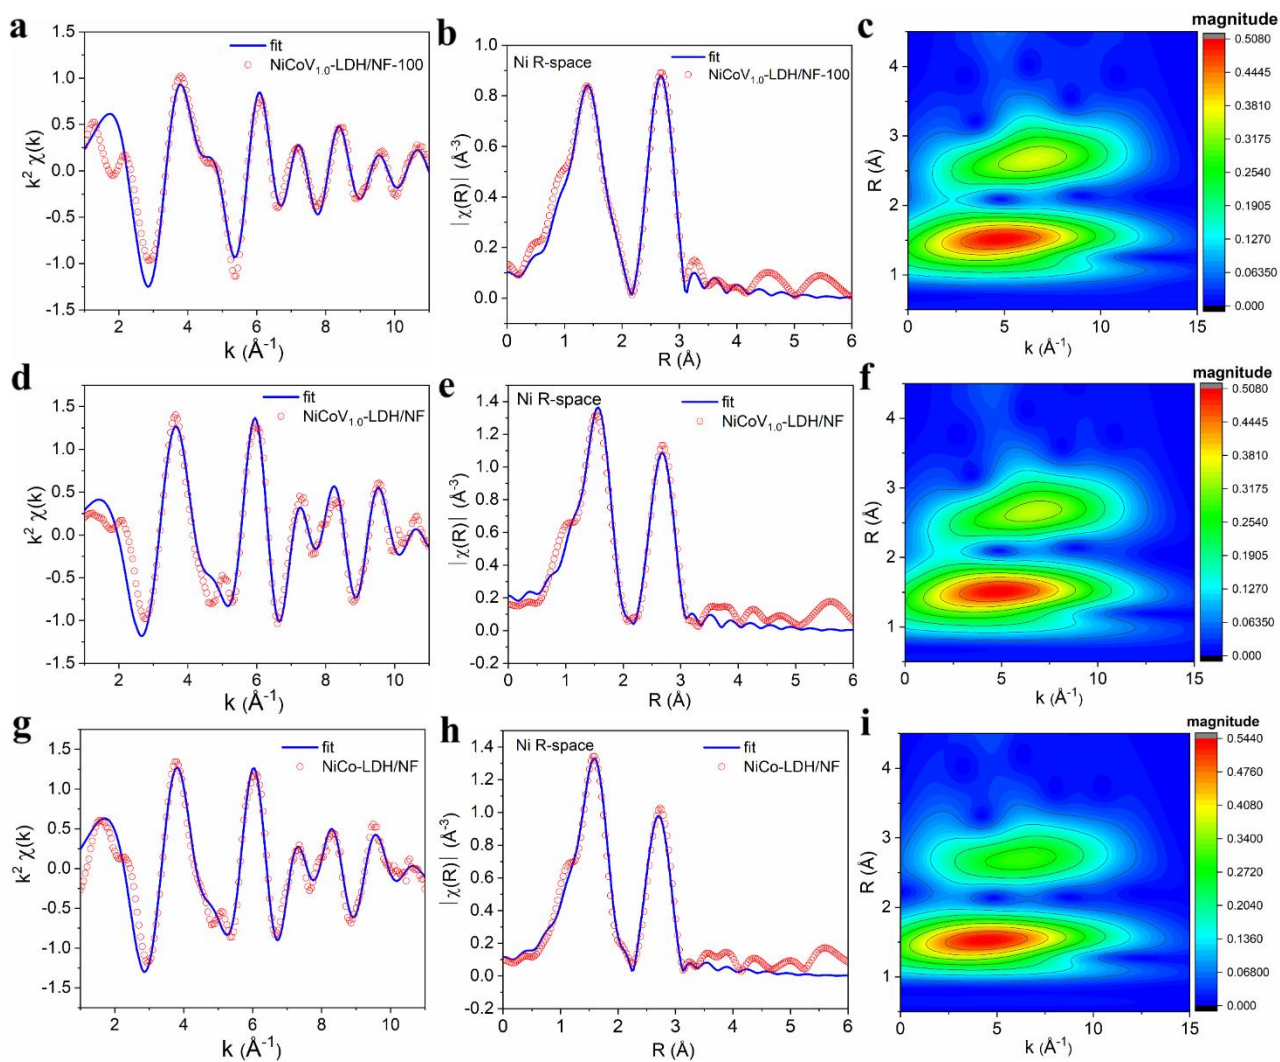

**Fig. S4** Ni K-edge EXAFS (points) and fit (line)  $k^2$  weighted  $k$ -space,  $k^2$  weighted  $R$ -space, and the wavelet transform: (a-c) NiCoV<sub>1.0</sub>-LDH/NF-100, (d-f) NiCoV<sub>1.0</sub>-LDH/NF, (g-i) NiCo-LDH/NF.

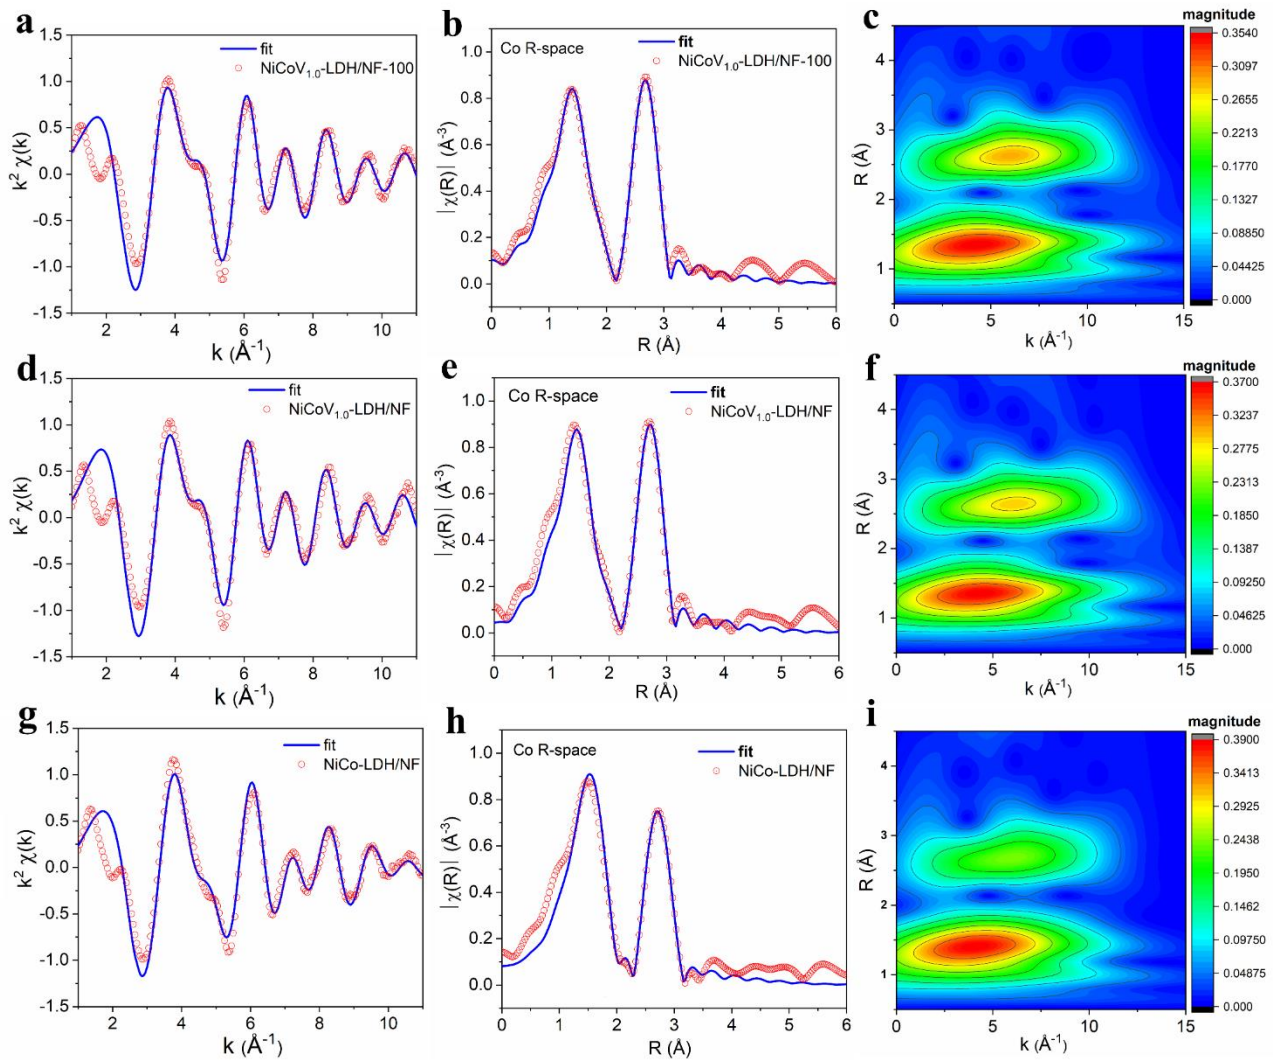

**Fig. S5** Co K-edge EXAFS (points) and fit (line)  $k^2$  weighted  $k$ -space,  $k^2$  weighted  $R$ -space, and the wavelet transform: (a-c) NiCoV<sub>1.0</sub>-LDH/NF-100, (d-f) NiCoV<sub>1.0</sub>-LDH/NF, (g-i) NiCo-LDH/NF.

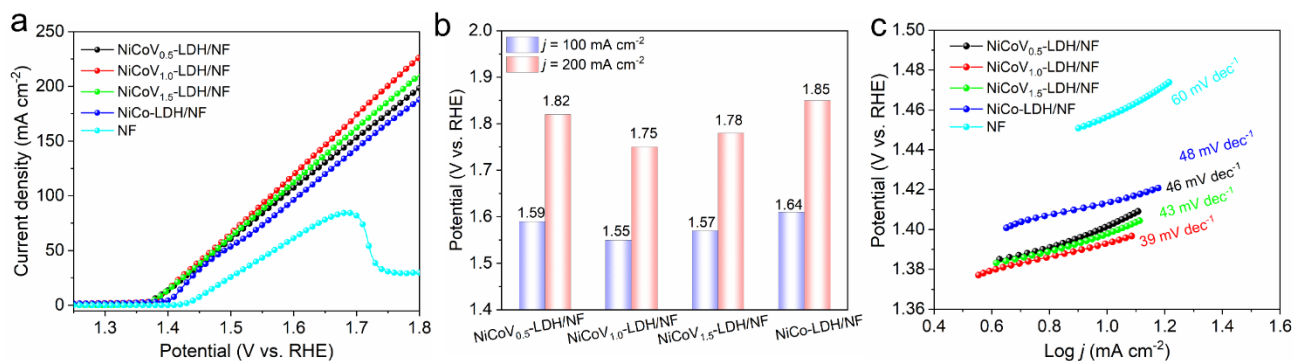

**Fig. S6** (a) UOR polarization, (b) comparison of potentials at 100 and 200 mA cm<sup>-2</sup>, (c) Tafel slopes of NiCoV<sub>x</sub>-LDH/NF ( $x = 0.5, 1.0, 1.5$ ), NiCo-LDH/NF and NF.

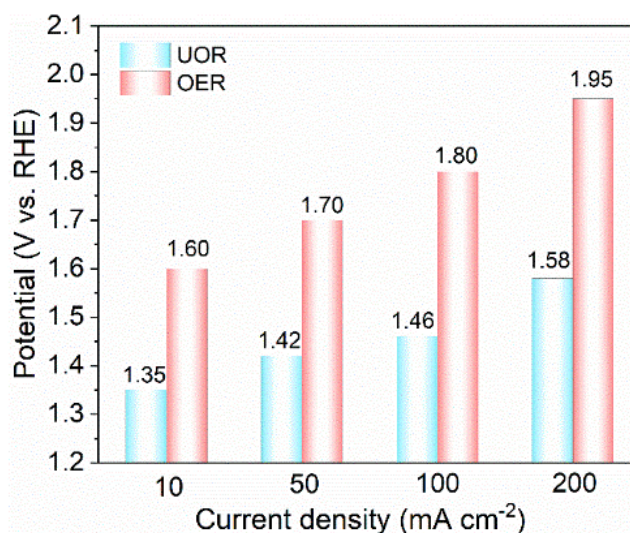

**Fig. S7** Potentials of NiCoV<sub>1.0</sub>-LDH/NF-100 needed to reach 10, 50, 100 and 200 mA cm<sup>-2</sup> for UOR and OER.

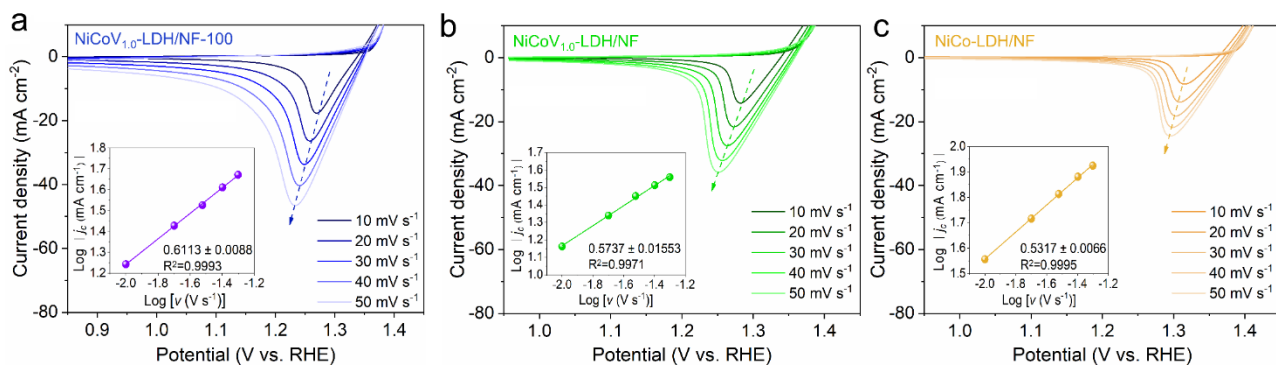

**Fig. S8** Cyclic voltammograms at different scan rates. The inset is plot of the logarithm of cathodic peak current density ( $j_c$ ) against the logarithm of scan rate ( $v$ ). (a) NiCoV<sub>1.0</sub>-LDH/NF-100, (b) NiCoV<sub>1.0</sub>-LDH/NF, (c) NiCo-LDH/NF composites.

The cyclic voltammetry (CV) curve was used to determine the effect of scanning rate on the electrocatalytic oxidation of urea in NiCoV<sub>1.0</sub>-LDH/NF-100 electrode. In general, the cathode current density ( $j_c$ ) increases with the increase of scanning rate ( $v$ ), and there is a power-law relationship between the peak cathode current density and scanning rate:  $j_c = av^b$  [4]. The exponential  $b$  value of the redox process can be obtained by comparing the logarithm of the cathode peak current density with the logarithm of the scanning rate. In two limiting conditions: (i) when  $b = 0.5$ , it is a diffusion-controlled redox process; (ii) when  $b = 1$ , it is non-diffusion controlled capacitive behavior. As shown in Fig. S8, the cathode current density of NiCoV<sub>1.0</sub>-LDH/NF-100 increased with increasing scan rate, and the logarithm of the peak cathode current density was linearly related to the logarithm of the scan rate, and  $b = 0.6113$ , indicating that UOR is an electrode process controlled by diffusion and surface capacitance. In addition, the  $b$  values of NiCoV<sub>1.0</sub>-LDH/NF and NiCo-LDH/NF were 0.5737 and 0.5317, respectively, indicating that the electrode processes are similar to those of NiCoV<sub>1.0</sub>-LDH/NF-100, which are both mixed-controlled electrode processes of diffusion and capacitance behavior.

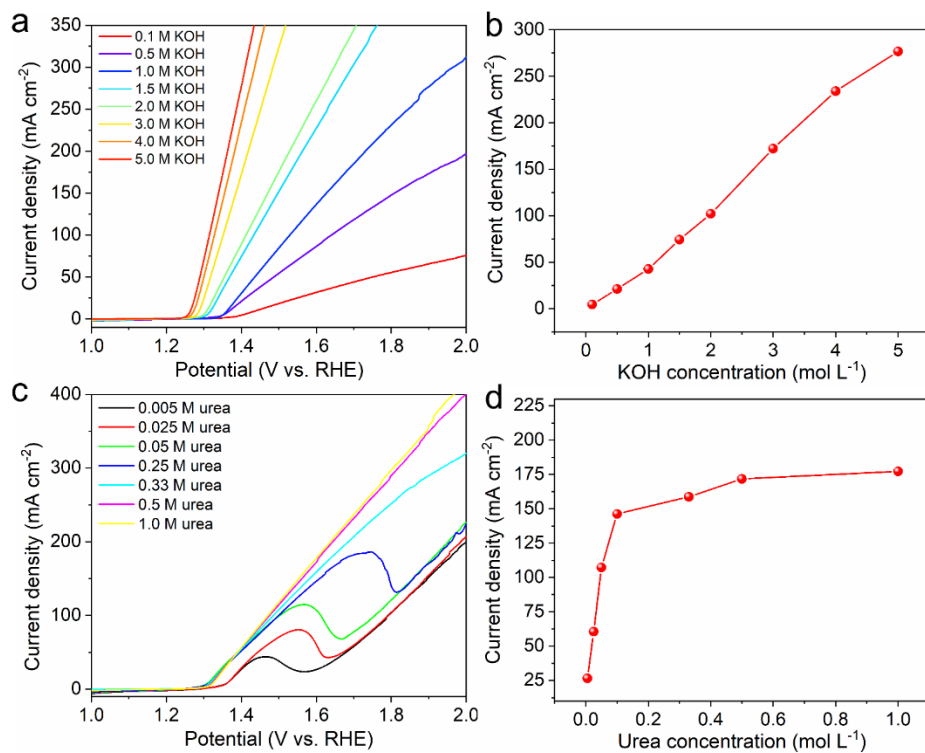

**Fig. S9** NiCoV<sub>1.0</sub>-LDH/NF-100 (a) LSV curves of different concentrations of KOH in 0.33 M urea; (b) LSV curves of urea with different concentrations in 1.0 M KOH. (c) Relation between current density and KOH at 1.4 V. (d) Relationship between current density and urea concentration at 1.6 V.

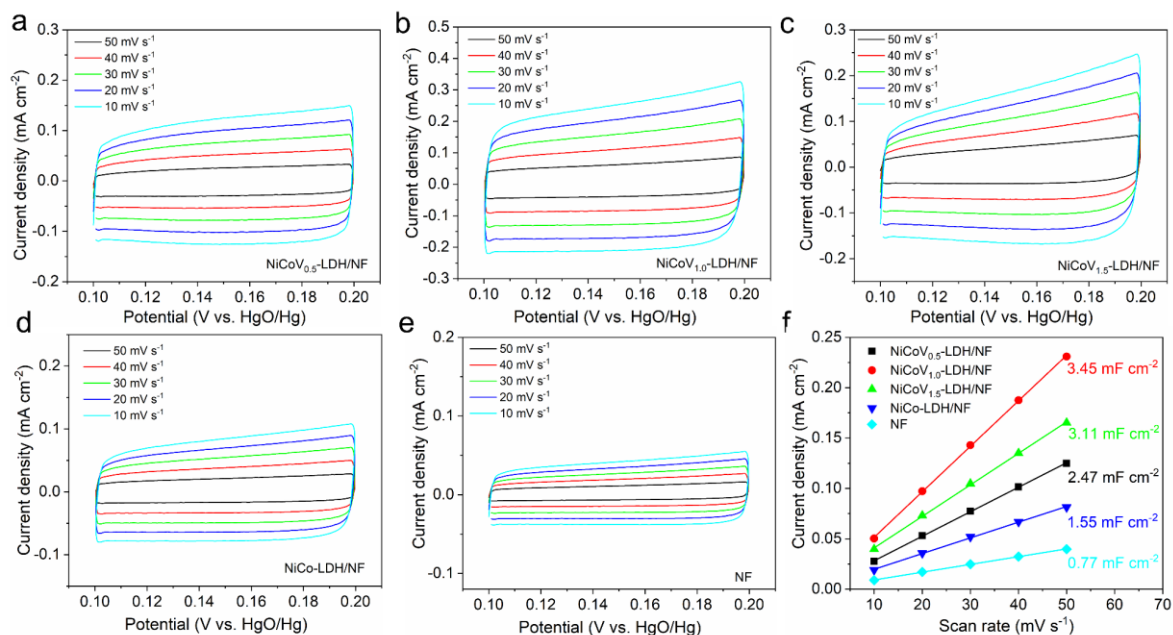

**Fig. S10** (a-d) Cyclic voltammetry curves of NiCoV<sub>x</sub>-LDH/NF ( $x = 0.5, 1.0, 1.5$ ), NiCo-LDH/NF composites and bare NF at various scan rates in the region of 0.1 - 0.2 V vs. Hg/HgO in 1 M KOH + 0.33 M urea solution. (f) The current densities of NiCoV<sub>x</sub>-LDH/NF ( $x = 0.5, 1.0, 1.5$ ), NiCo-LDH/NF composites and bare NF plotted against different scan rates (10, 20, 30, 40, 50 mV s<sup>-1</sup>).

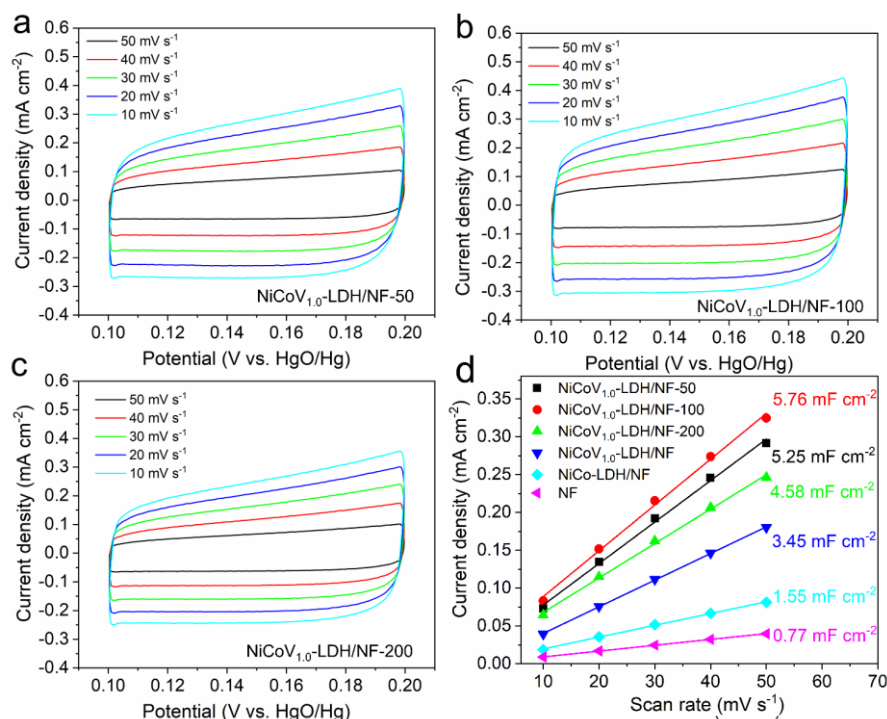

**Fig. S11** (a-c) Cyclic voltammetry curves of the NiCoV<sub>1.0</sub>-LDH/NF- $y$  ( $y = 50, 100, 200$ ) composites at various scan rates in the region of 0.1 - 0.2 V vs. Hg/HgO in 1 M KOH + 0.33 M urea solution. (d) The current densities of NiCoV<sub>1.0</sub>-LDH/NF- $y$  ( $y = 50, 100, 200$ ), NiCoV<sub>1.0</sub>-LDH/NF, NiCo-LDH/NF composites and bare NF plotted against different scan rates (10, 20, 30, 40, 50 mV s<sup>-1</sup>).

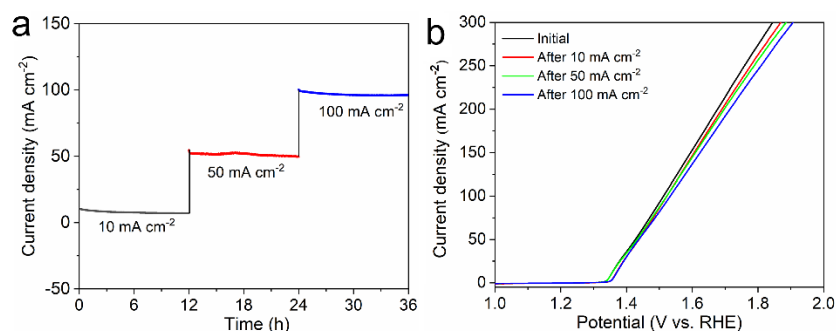

**Fig. S12** (a) UOR stability test and (b) LSV comparison before and after stability test of NiCoV<sub>1.0</sub>-LDH/NF-100 composite.

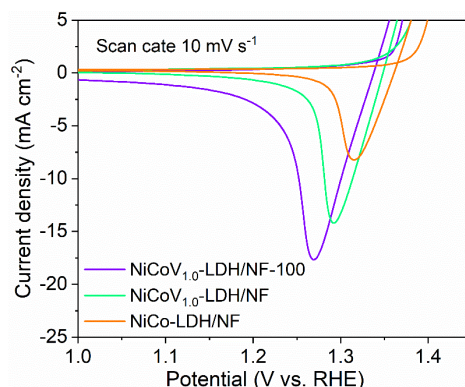

**Fig. S13** CV curves for UOR of NiCoV<sub>1.0</sub>-LDH/NF-100, NiCoV<sub>1.0</sub>-LDH/NF and NiCo-LDH/NF composites at a scan rate of 10 mV s<sup>-1</sup>.

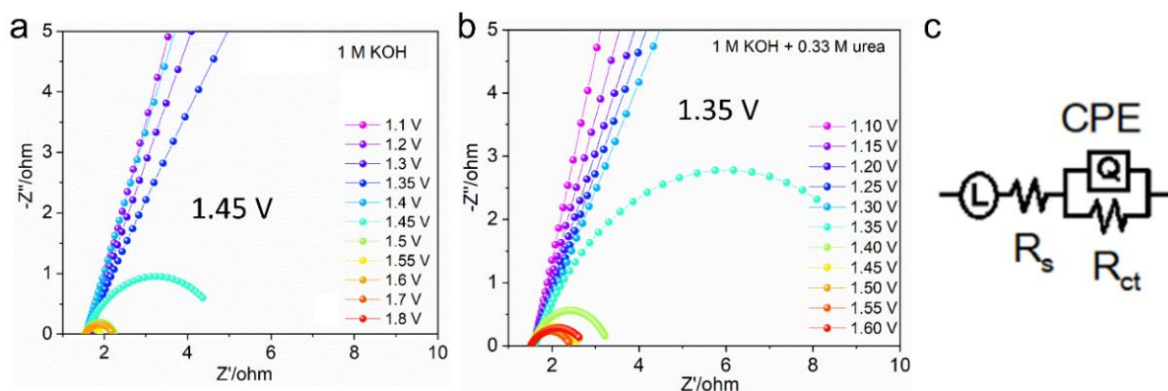

**Fig. S14** In-situ Nyquist diagram in 1 M KOH (a) and 1 M KOH + 0.33 M urea (b) of NiCoV<sub>1.0</sub>-LDH/NF-100 and corresponding fitting circuit diagram (c).

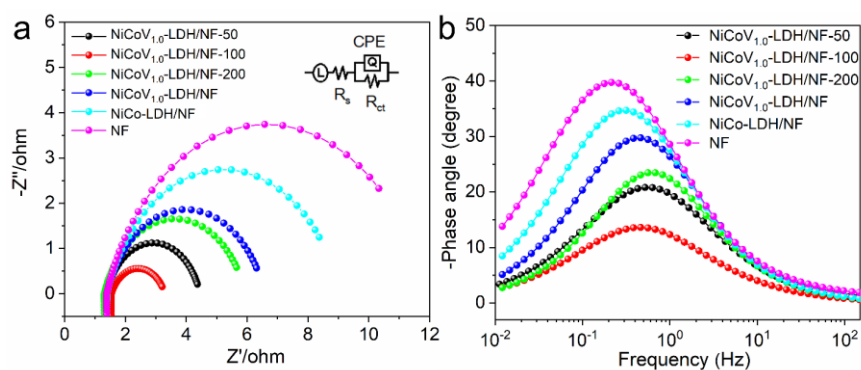

**Fig. S15** (a) Nyquist diagram and (b) Bode diagram of NiCoV<sub>1.0</sub>-LDH/NF- $\gamma$  ( $\gamma = 50, 100, 200$ ), NiCoV<sub>1.0</sub>-LDH/NF, NiCo-LDH/NF and NF at 1.45 V in 1 M KOH + 0.33 M urea.

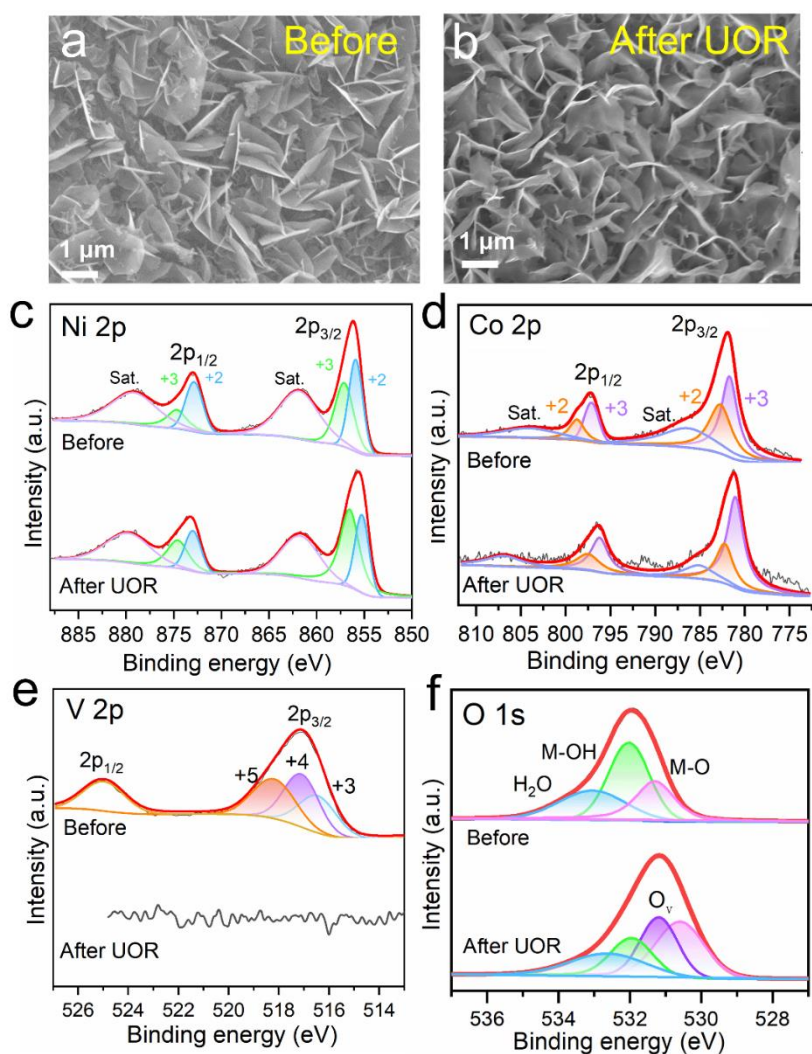

**Fig. S16** (a-b) SEM comparison of NiCoV<sub>1.0</sub>-LDH/NF-100 before and after UOR reaction. (c-f) Ni 2p, Co 2p, V 2p, C 1s and O 1s XPS spectra of NiCoV<sub>1.0</sub>-LDH/NF-100 before and after UOR stability.

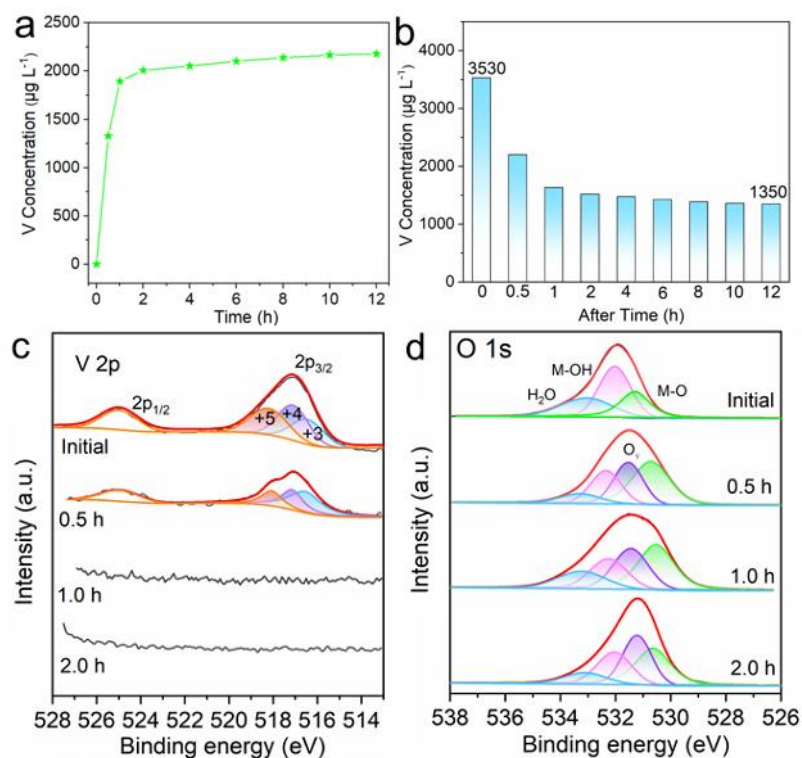

**Fig. S17** (a) The dissolved V concentration in the electrolyte of NiCoV<sub>1.0</sub>-LDH/NF-100 via ICP; (b) V concentration in NiCoV<sub>1.0</sub>-LDH/NF-100 at different reaction time. (c-d) Comparison V 2p and O 1s XPS of NiCoV<sub>1.0</sub>-LDH/NF-100 at different reaction time in UOR.

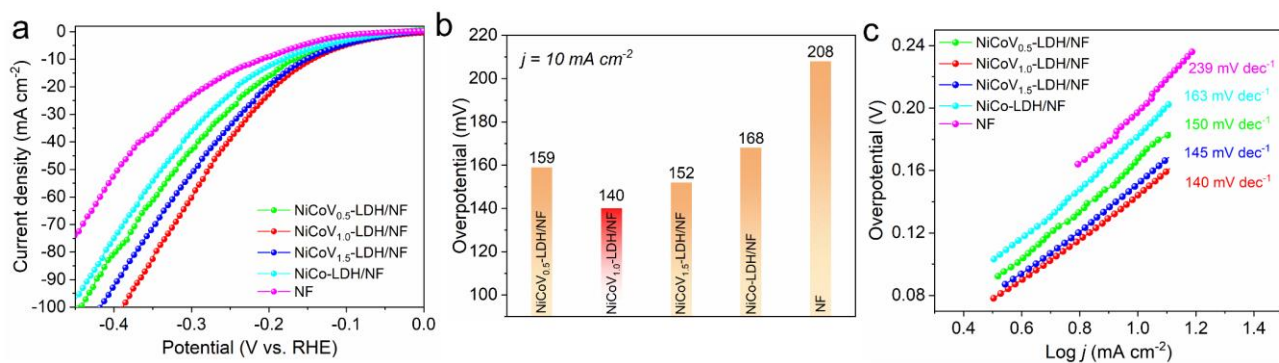

**Fig. S18** (a) HER polarization curves, (b) comparison of overpotentials at  $10 \text{ mA cm}^{-2}$ , (c) Tafel slopes of NiCoV<sub>x</sub>-LDH/NF ( $x = 0.5, 1.0, 1.5$ ), NiCo-LDH/NF and NF.

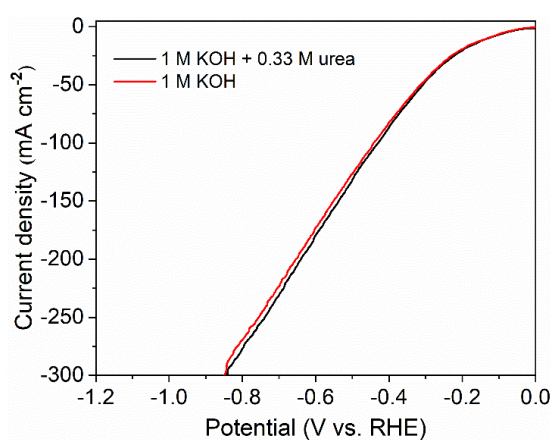

**Fig. S19** The HER polarization curves of NiCoV<sub>1.0</sub>-LDH/NF-100 in 1 M KOH and 1 M KOH + 0.33 M urea were compared.

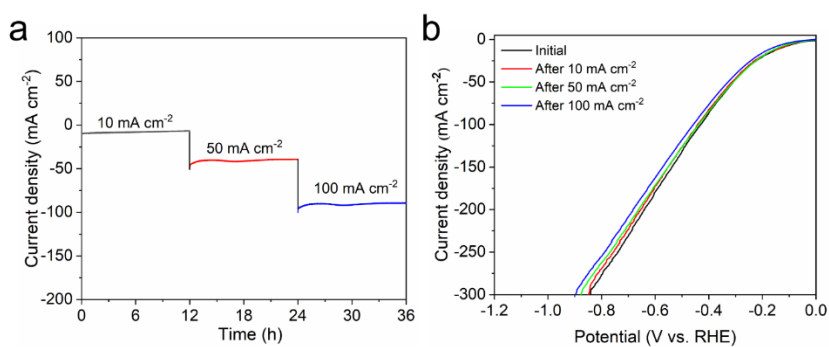

**Fig. S20** (a) HER stability test and (b) LSV comparison before and after stability test of NiCoV<sub>1.0</sub>-LDH/NF-100 composite.

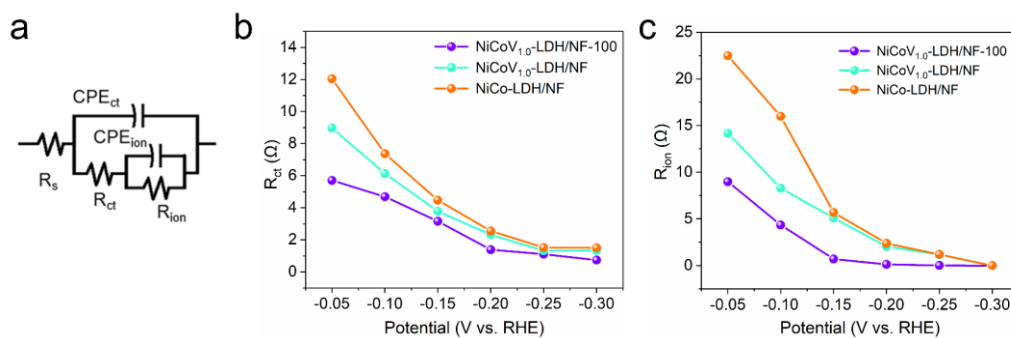

**Fig. S21** (a) Equivalent circuit used for modeling the measured electrochemical response; (b, c) the  $R_{ct}$  and  $R_{ion}$  values of various catalysts at different voltages according to the fitted data of EIS.

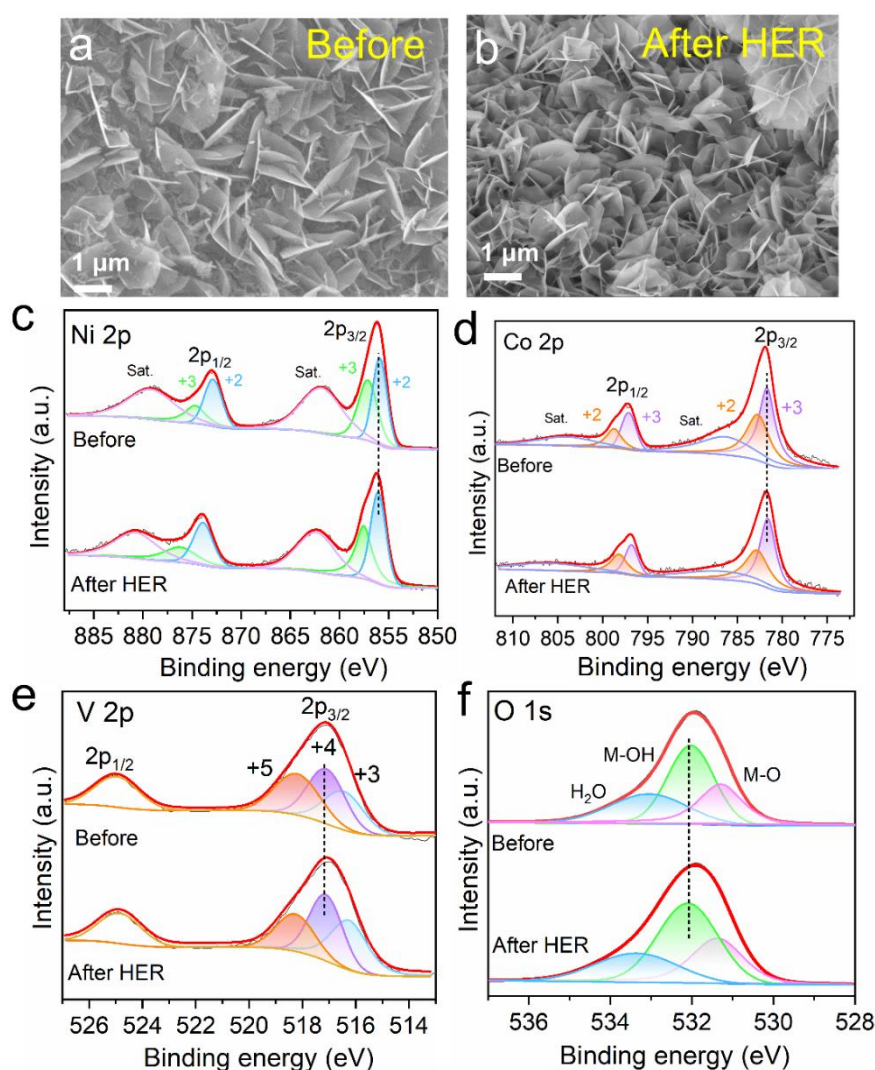

**Fig. S22** (a-b) SEM comparison of NiCoV<sub>1.0</sub>-LDH/NF-100 composite before and after HER reaction. (c-f) Ni 2p, Co 2p, V 2p, C 1s and O 1s XPS spectra of NiCoV<sub>1.0</sub>-LDH/NF-100 before and after HER stability.

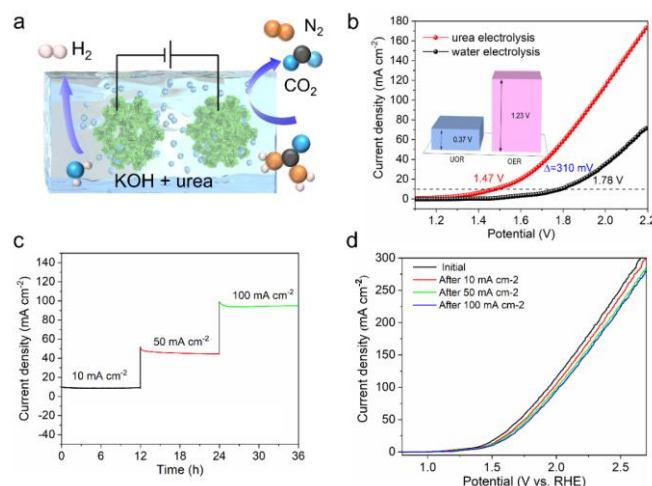

**Fig. S23** (a) Schematic illustration of urea-assisted water electrolysis using NiCoV<sub>1.0</sub>-LDH/NF-100 as bifunctional electrodes; (b) comparison of polarization curves of NiCoV<sub>1.0</sub>-LDH/NF-100 during urea-assisted water electrolysis and water electrolysis; (c-d) stability test of NiCoV<sub>1.0</sub>-LDH/NF-100 electrode in urea-assisted electrolysis water and comparison of LSV curves before and after stability test.

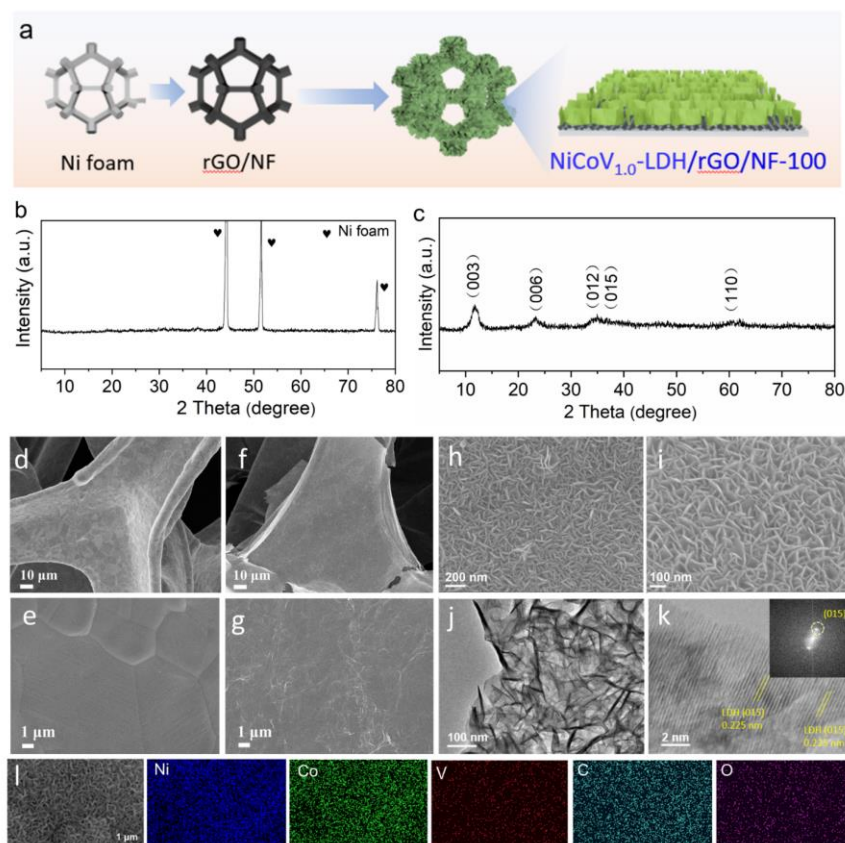

**Fig. S24** (a) Synthesis strategy schematic of NiCoV<sub>1.0</sub>-LDH/rGO/NF-100 with nanosheet array morphology; (b, c) XRD patterns of NiCoV<sub>1.0</sub>-LDH/rGO/NF-100 and corresponding scraped powder sample. SEM images of NF (d, e) and rGO/NF (f, g). SEM (h, i), (HR)TEM (j, k) and SEM-EDX elemental mapping images (l) of NiCoV<sub>1.0</sub>-LDH/rGO/NF-100.

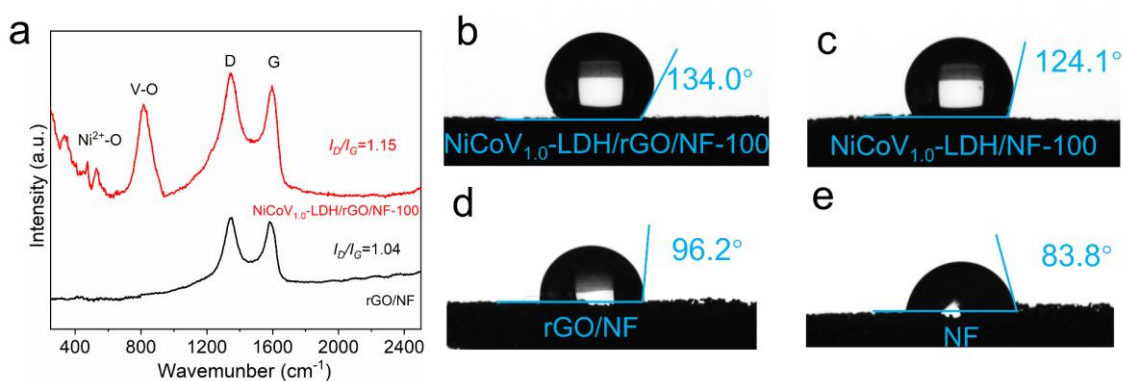

**Fig. S25** (a) Raman spectra of NiCoV<sub>1.0</sub>-LDH/rGO/NF-100 and rGO/NF. (b-e) Contact angles of NiCoV<sub>1.0</sub>-LDH/rGO/NF-100, NiCoV<sub>1.0</sub>-LDH/NF-100, rGO/NF and NF.

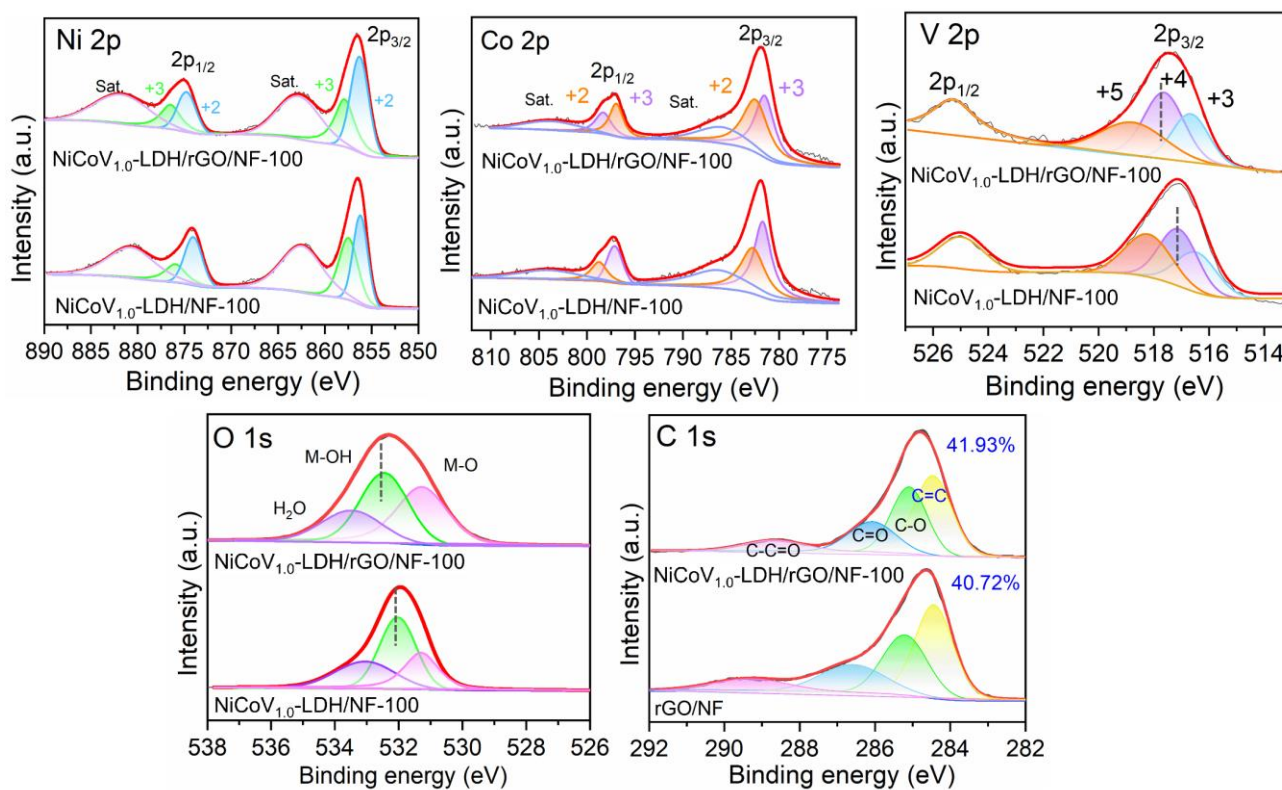

**Fig. S26** XPS spectra of NiCoV<sub>1.0</sub>-LDH/rGO/NF-100, NiCoV<sub>1.0</sub>-LDH/NF-100 and rGO/NF.

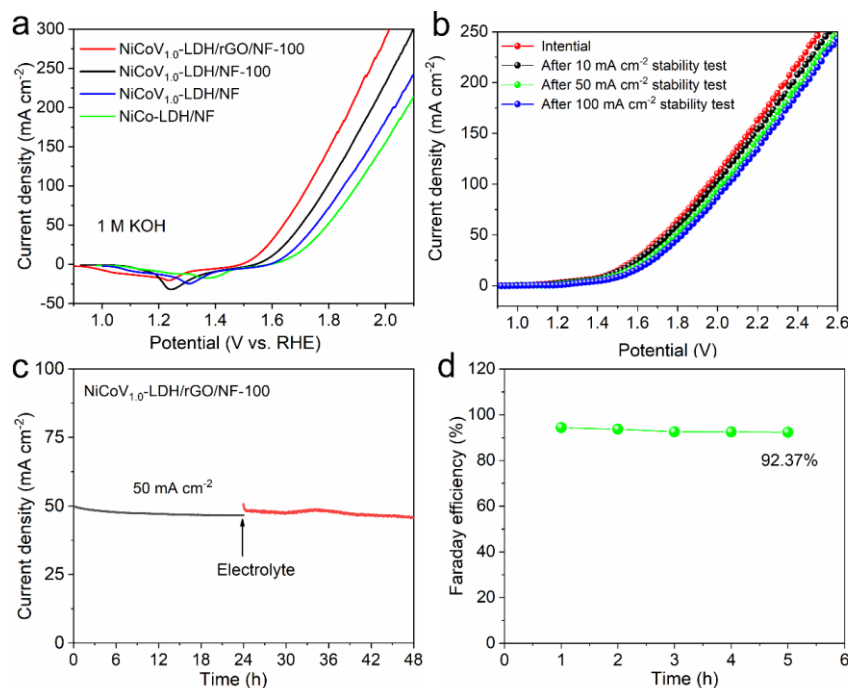

**Fig. S27** (a) OER polarization curve of NiCoV<sub>1.0</sub>-LDH/rGO/NF-100, NiCoV<sub>1.0</sub>-LDH/NF-100, NiCoV<sub>1.0</sub>-LDH/NF, and NiCo-LDH/NF. (b) Comparison of LSV curves before and after stability test of NiCoV<sub>1.0</sub>-LDH/rGO/NF-100. (c) Stability before and after electrolyte replacement of NiCoV<sub>1.0</sub>-LDH/rGO/NF-100. (d) Faradaic efficiency of H<sub>2</sub> production assisted by urea electrocatalysis system upon operation time at 50  $\text{mA cm}^{-2}$ .

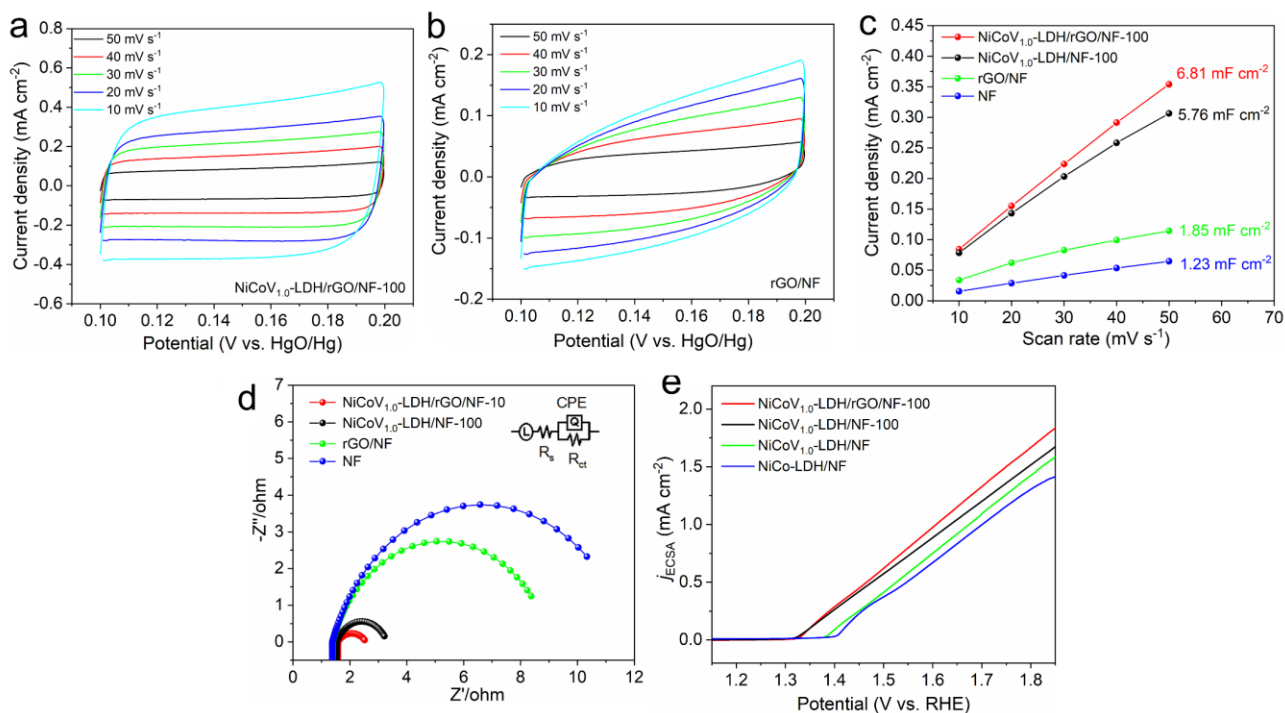

**Fig. S28** (a-b) Cyclic voltammetry curves of NiCoV<sub>1.0</sub>-LDH/rGO/NF-100 and rGO/NF at various scan rates in the region of 0.1-0.2 V vs. Hg/HgO. (c) The capacitive current densities of NiCoV<sub>1.0</sub>-LDH/rGO/NF-100, NiCoV<sub>1.0</sub>-LDH/NF-100, rGO/NF and bare NF plotted against different scan rates. (d) Nyquist plots of NiCoV<sub>1.0</sub>-LDH/rGO/NF-100, NiCoV<sub>1.0</sub>-LDH/NF-100, rGO/NF and bare NF during UOR process, the inset is the corresponding equivalent circuit. (e) ECSA normalized LSV curves of NiCoV<sub>1.0</sub>-LDH/rGO/NF-100, NiCoV<sub>1.0</sub>-LDH/NF-100, NiCoV<sub>1.0</sub>-LDH/NF and NiCo-LDH/NF.

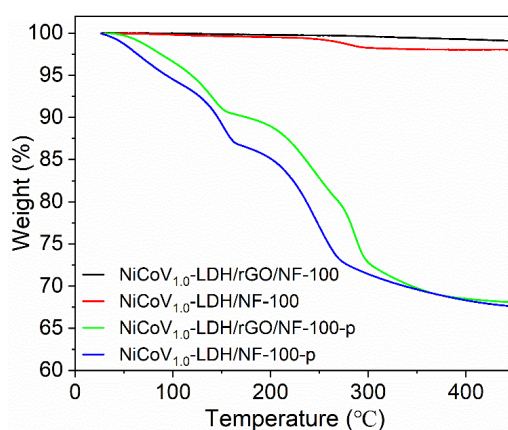

**Fig. S29** TGA plots of NiCoV<sub>1.0</sub>-LDH/rGO/NF-100, NiCoV<sub>1.0</sub>-LDH/NF-100 and corresponding pure LDH, the suffix "p" stands for LDH precipitate formed during the synthesis of NiCoV<sub>1.0</sub>-LDH/rGO/NF-100-p, which is named in the same way.

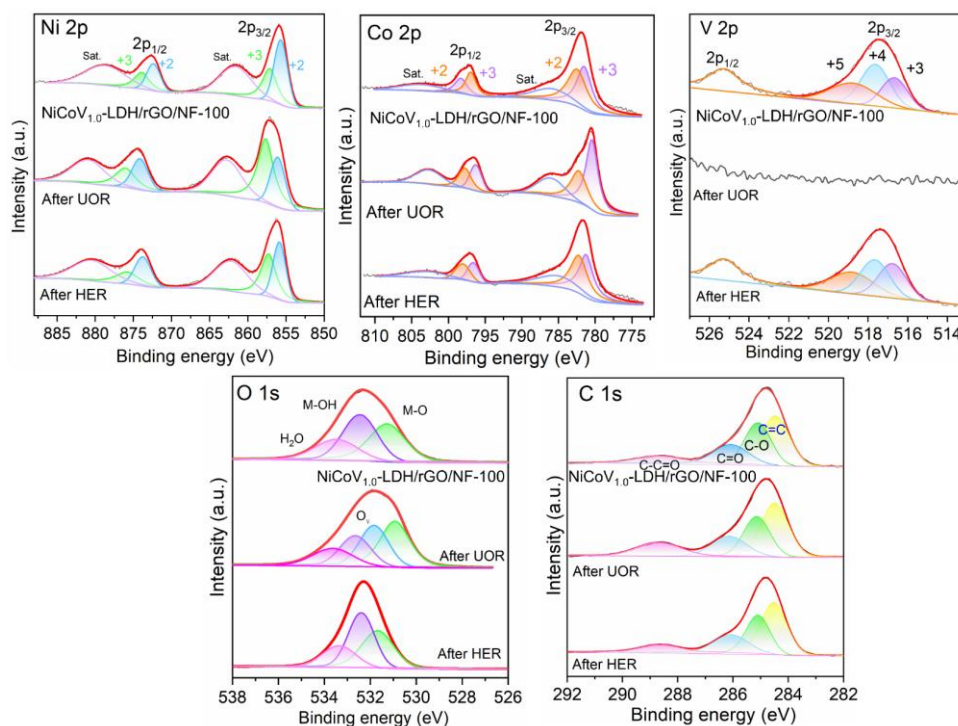

**Fig. S30** Ni 2p, Co 2p, V 2p, C 1s and O 1s XPS spectrums of NiCoV<sub>1.0</sub>-LDH/rGO/NF-100 composite before and after the chronoamperometry measurement.

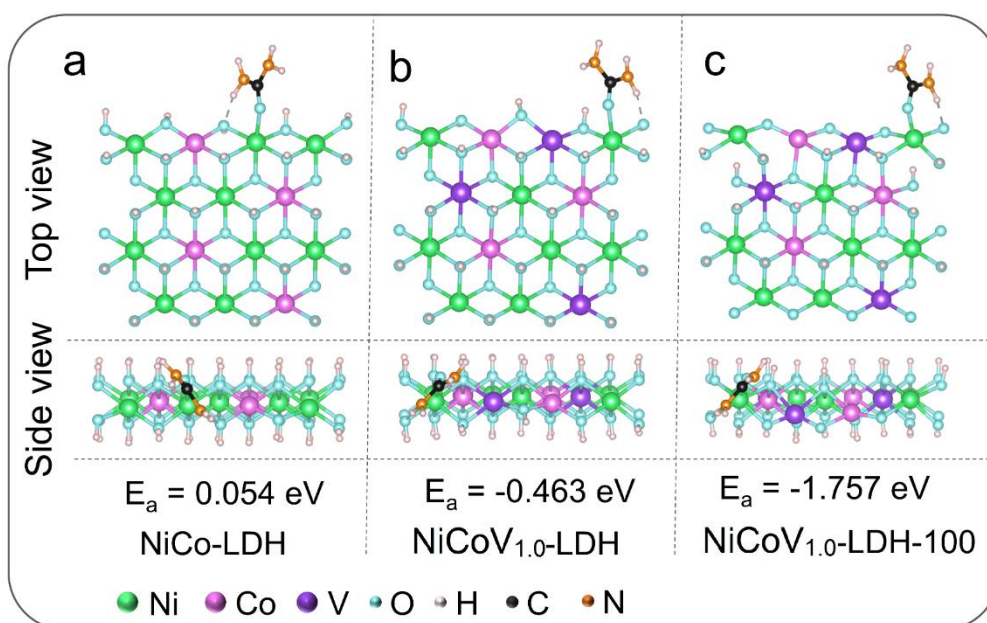

**Fig. S31** Adsorption structure model of urea molecule at Ni metal sites in (a) NiCo-LDH, (b) NiCoV<sub>1.0</sub>-LDH and (c) NiCoV<sub>1.0</sub>-LDH-100.

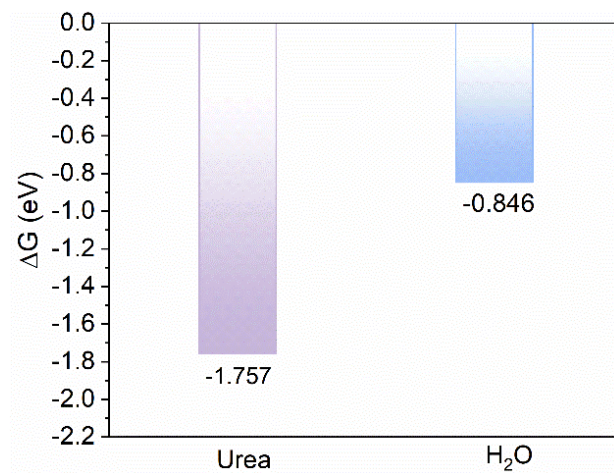

**Fig. S32** Comparison of adsorption energies of urea and water molecules on NiCoV<sub>1.0</sub>-LDH-100 catalyst.

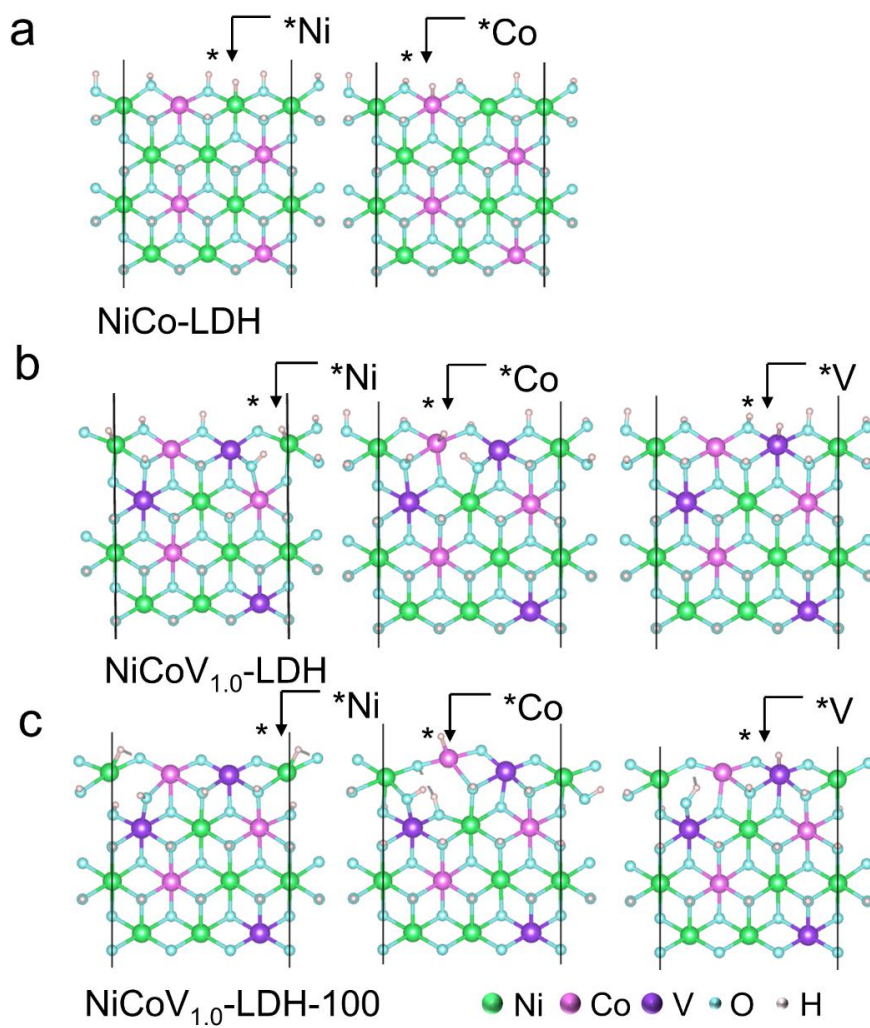

**Fig. S33** Adsorption structure model of H atom at all metal sites (Ni, Co and V) in (a) NiCo-LDH, (b) NiCoV<sub>1.0</sub>-LDH and (c) NiCoV<sub>1.0</sub>-LDH-100.

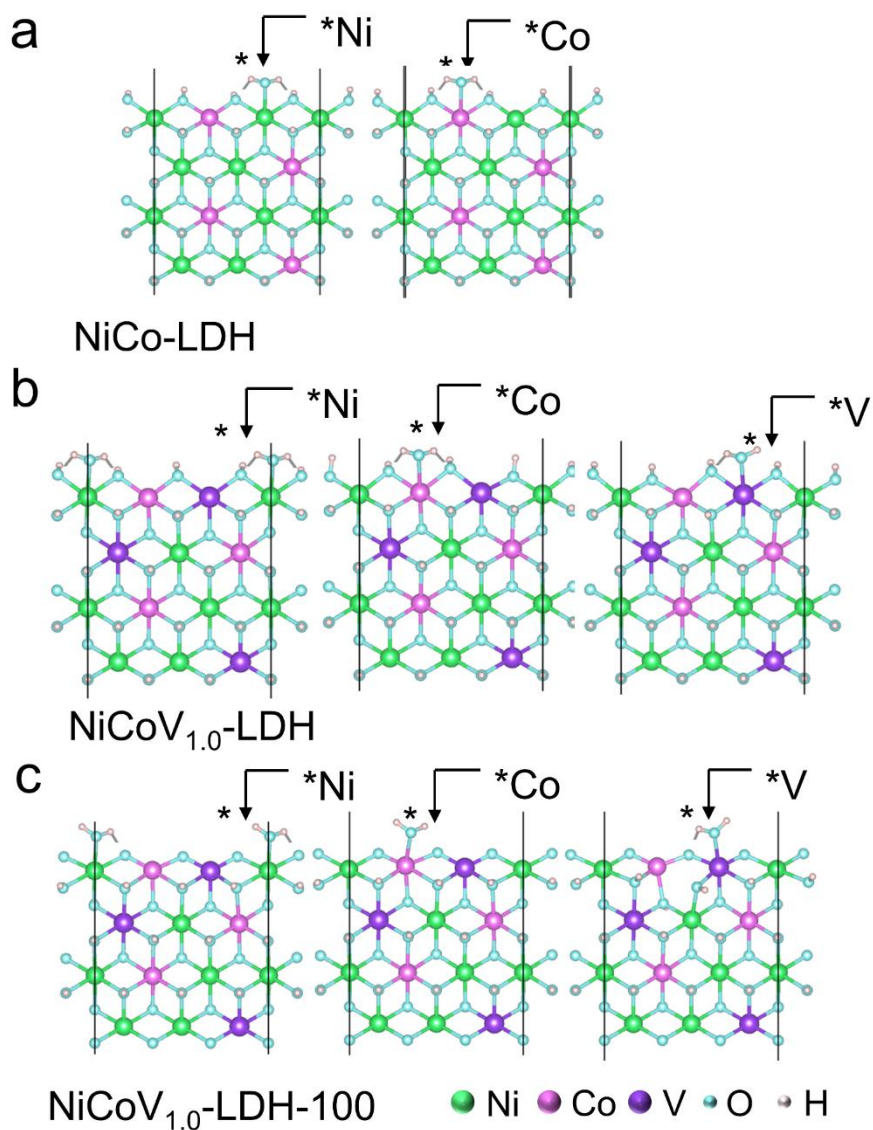

**Fig. S34** Adsorption structure model of H<sub>2</sub>O molecule at all metal sites (Ni, Co and V) in (a) NiCo-LDH, (b) NiCoV<sub>1.0</sub>-LDH and (c) NiCoV<sub>1.0</sub>-LDH-100.

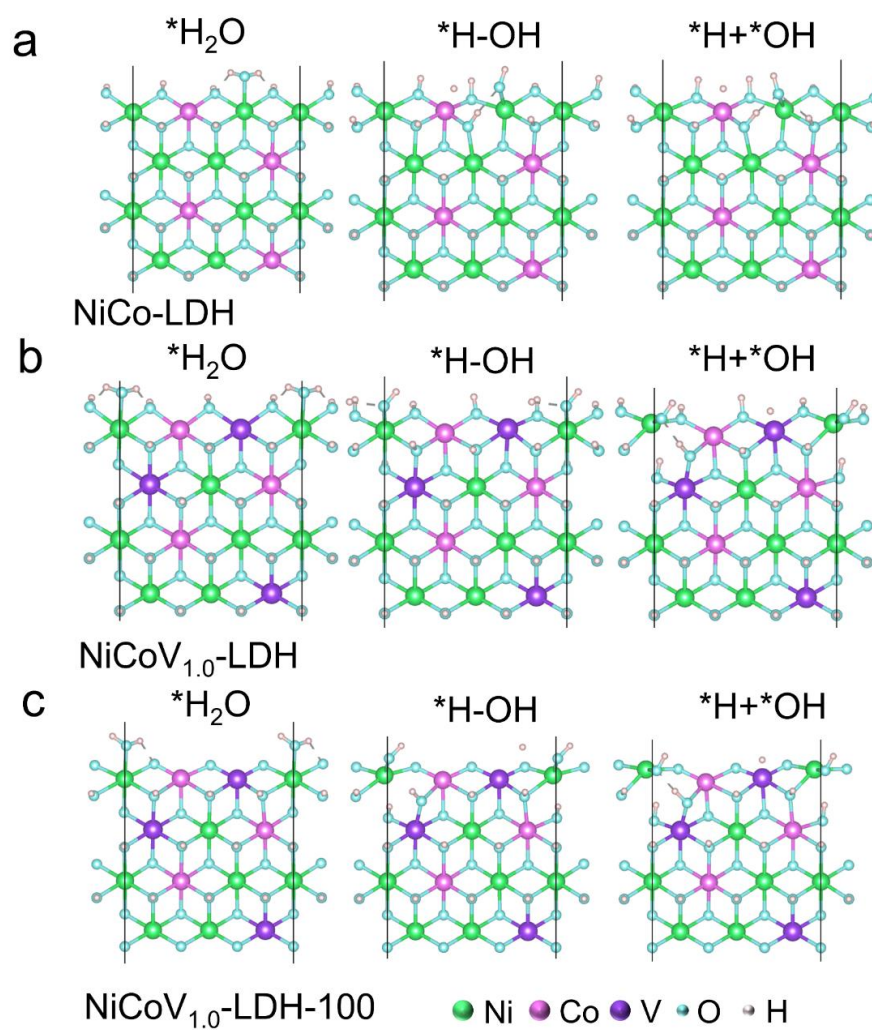

**Fig. S35** Transition barrier model for  $\text{H}_2\text{O}$  dissociation of (a) NiCo-LDH, (b) NiCoV<sub>1.0</sub>-LDH and (c) NiCoV<sub>1.0</sub>-LDH-100.

**Table S1.** XRD parameters and ICP data for the NiCoV<sub>1.0</sub>-LDH/NF-*y* (*y* = 50, 100, 200), NiCoV<sub>*x*</sub>-LDH/NF (*x* = 0.5, 1.0, 1.5) and NiCo-LDH/NF composites.

| Samples                          | <i>d</i> <sub>003</sub> (nm) | <i>c</i> (nm) <sup>a</sup> | <i>D</i> <sub>003</sub> (nm) <sup>b</sup> | Ni/Co/V ratio (ICP) |
|----------------------------------|------------------------------|----------------------------|-------------------------------------------|---------------------|
| NiCoV <sub>1.0</sub> -LDH/NF-50  | 0.7677                       | 2.3031                     | 14.09                                     | 2.26:1.01:0.80      |
| NiCoV <sub>1.0</sub> -LDH/NF-100 | 0.7674                       | 2.3022                     | 13.92                                     | 2.32:0.92:0.76      |
| NiCoV <sub>1.0</sub> -LDH/NF-200 | 0.7631                       | 2.2893                     | 12.65                                     | 2.13:0.95:0.81      |
| NiCoV <sub>1.5</sub> -LDH/NF     | 0.7651                       | 2.2953                     | 14.35                                     | 2.14:1.02:1.45      |
| NiCoV <sub>1.0</sub> -LDH/NF     | 0.7684                       | 2.3052                     | 15.35                                     | 2.21:0.92:0.85      |
| NiCoV <sub>0.5</sub> -LDH/NF     | 0.7702                       | 2.3106                     | 16.98                                     | 2.17:0.98:0.52      |
| NiCo-LDH/NF                      | 0.7604                       | 2.2512                     | 16.65                                     | 2.03:1.09           |

<sup>a</sup> Based on hexagonal system,  $c = 3d_{003}$ ; <sup>b</sup> based on Scherrer equation,  $D_{hkl} = k\lambda/(\beta\cos\theta)$ ,  $k = 0.89$ ,  $\lambda = 0.1542$  nm,  $\beta$  is the full width half maximum of the diffraction peak (rad.),  $\theta$  is Bragg angle (°).

**Table S2.** The calculated ratios of  $\text{Ni}^{3+}/\text{Ni}^{2+}$ ,  $\text{Co}^{3+}/\text{Co}^{2+}$ ,  $\text{V}^{4+}/(\text{V}^{3+} + \text{V}^{4+} + \text{V}^{5+})$  in  $\text{NiCoV}_{1.0}\text{-LDH/NF-}y$  ( $y = 50, 100, 200$ ),  $\text{NiCoV}_{1.0}\text{-LDH/NF}$ ,  $\text{NiCo-LDH/NF}$  composites.

| (A) Samples                            | Ni $2p_{3/2}$ /eV       |                         | Ni $2p_{1/2}$ /eV       |                                                                        | $\text{Ni}^{3+}/\text{Ni}^{2+}$<br>ratio |
|----------------------------------------|-------------------------|-------------------------|-------------------------|------------------------------------------------------------------------|------------------------------------------|
|                                        | $\text{Ni}^{3+}$ (area) | $\text{Ni}^{2+}$ (area) | $\text{Ni}^{3+}$ (area) | $\text{Ni}^{2+}$ (area)                                                |                                          |
| $\text{NiCoV}_{1.0}\text{-LDH/NF-50}$  | 857.82 (40075)          | 856.30 (103104)         | 875.09 (36734)          | 873.73 (32309)                                                         | 0.38                                     |
| $\text{NiCoV}_{1.0}\text{-LDH/NF-100}$ | 857.87 (42878)          | 856.33 (103879)         | 875.98 (22902)          | 874.05 (50774)                                                         | 0.41                                     |
| $\text{NiCoV}_{1.0}\text{-LDH/NF-200}$ | 857.04 (37041)          | 855.54 (93034)          | 875.01 (39108)          | 873.27 (34998)                                                         | 0.39                                     |
| $\text{NiCoV}_{1.0}\text{-LDH/NF}$     | 857.52 (36775)          | 856.26 (99482)          | 575.60 (62873)          | 873.95 (35633)                                                         | 0.37                                     |
| $\text{NiCo-LDH/NF}$                   | 856.99 (27594)          | 855.27 (122472)         | 874.40 (34136)          | 873.20 (42388)                                                         | 0.23                                     |
| (B) Samples                            | Co $2p_{3/2}$ /eV       |                         | Co $2p_{1/2}$ /eV       |                                                                        | $\text{Co}^{3+}/\text{Co}^{2+}$<br>ratio |
|                                        | $\text{Co}^{3+}$ (area) | $\text{Co}^{2+}$ (area) | $\text{Co}^{3+}$ (area) | $\text{Co}^{2+}$ (area)                                                |                                          |
| $\text{NiCoV}_{1.0}\text{-LDH/NF-50}$  | 781.60 (22381)          | 782.31 (23674)          | 797.10 (6003)           | 798.42 (9133)                                                          | 0.94                                     |
| $\text{NiCoV}_{1.0}\text{-LDH/NF-100}$ | 781.70 (33416)          | 782.73 (29574)          | 797.11 (10995)          | 798.73 (8389)                                                          | 1.13                                     |
| $\text{NiCoV}_{1.0}\text{-LDH/NF-200}$ | 781.02 (32607)          | 782.24 (35442)          | 796.38 (8834)           | 797.85 (7911)                                                          | 0.92                                     |
| $\text{NiCoV}_{1.0}\text{-LDH/NF}$     | 781.84 (23965)          | 782.56 (26379)          | 797.14 (8274)           | 798.65 (9542)                                                          | 0.90                                     |
| $\text{NiCo-LDH/NF}$                   | 781.98 (25125)          | 782.33 (30495)          | 796.78 (6063)           | 798.30 (5259)                                                          | 0.82                                     |
| (C) Samples                            | V $2p_{3/2}$ /eV        |                         |                         | $\text{V}^{4+} / (\text{V}^{3+} + \text{V}^{4+} + \text{V}^{5+}) / \%$ |                                          |
|                                        | $\text{V}^{3+}$ (area)  | $\text{V}^{4+}$ (area)  | $\text{V}^{5+}$ (area)  |                                                                        |                                          |
| $\text{NiCoV}_{1.0}\text{-LDH/NF-50}$  | 515.89 (1241)           | 516.80 (970)            | 517.80 (623)            | 34.22                                                                  |                                          |
| $\text{NiCoV}_{1.0}\text{-LDH/NF-100}$ | 516.43 (1267)           | 517.08 (1692)           | 518.21 (1532)           | 37.61                                                                  |                                          |
| $\text{NiCoV}_{1.0}\text{-LDH/NF-200}$ | 515.95 (1156)           | 517.08 (869)            | 518.41 (686)            | 32.05                                                                  |                                          |
| $\text{NiCoV}_{1.0}\text{-LDH/NF}$     | 515.61 (2084)           | 516.63 (1390)           | 518.05 (975)            | 31.24                                                                  |                                          |

**Table S3.** The EAXFS fitting parameters and results of Ni and Co in NiCoV<sub>1.0</sub>-LDH/NF-100, NiCoV<sub>1.0</sub>-LDH/NF and NiCo-LDH/NF composites.

| Samples                          | Shell | <sup>a</sup> C.N. | <sup>b</sup> R(Å) | <sup>c</sup> σ <sup>2</sup> (Å <sup>2</sup> ) | ΔE <sub>0</sub> (eV) <sup>d</sup> | S <sub>0</sub> <sup>2</sup> | <sup>d</sup> R-factor |
|----------------------------------|-------|-------------------|-------------------|-----------------------------------------------|-----------------------------------|-----------------------------|-----------------------|
| NiCoV <sub>1.0</sub> -LDH/NF-100 | Ni-O  | 5.6 ± 0.3         | 2.05              | 0.006                                         | -4.9 ± 0.4                        | 0.8061                      | 0.017                 |
|                                  | Ni-Ni | 5.1 ± 0.4         | 3.07              | 0.007                                         |                                   |                             |                       |
|                                  | Co-O  | 6.0 ± 0.2         | 1.97              | 0.012                                         |                                   |                             |                       |
|                                  | Co-Ni | 0.2 ± 0.1         | 2.49              | 0.001                                         | -5.7 ± 0.3                        | 0.8052                      | 0.005                 |
|                                  | Co-Co | 5.1 ± 0.3         | 3.06              | 0.010                                         |                                   |                             |                       |
|                                  | Co-V  | 0.3 ± 0.2         | 2.31              | 0.018                                         |                                   |                             |                       |
| NiCoV <sub>1.0</sub> -LDH/NF     | Ni-O  | 6.0 ± 0.3         | 2.05              | 0.006                                         | -5.9 ± 0.4                        | 0.8061                      | 0.017                 |
|                                  | Ni-Ni | 5.2 ± 0.4         | 3.08              | 0.007                                         |                                   |                             |                       |
|                                  | Co-O  | 6.0 ± 0.4         | 1.98              | 0.012                                         |                                   |                             |                       |
|                                  | Co-Ni | 1.1 ± 0.4         | 2.49              | 0.010                                         | -2.8 ± 0.5                        | 0.8052                      | 0.019                 |
|                                  | Co-Co | 5.5 ± 0.4         | 3.08              | 0.009                                         |                                   |                             |                       |
|                                  | Co-V  | 0.9 ± 0.2         | 2.31              | 0.007                                         |                                   |                             |                       |
| NiCo-LDH/NF                      | Ni-O  | 6.0 ± 0.2         | 2.05              | 0.006                                         | -2.3 ± 0.3                        | 0.8061                      | 0.014                 |
|                                  | Ni-Ni | 6.0 ± 0.4         | 3.07              | 0.010                                         |                                   |                             |                       |
|                                  | Co-O  | 5.9 ± 0.2         | 2.04              | 0.011                                         | -2.0 ± 0.3                        | 0.8052                      | 0.010                 |
|                                  | Co-Ni | 5.2 ± 0.3         | 3.10              | 0.011                                         |                                   |                             |                       |
|                                  | Co-Co | 1.1 ± 0.4         | 3.43              | 0.020                                         |                                   |                             |                       |

<sup>a</sup> C.N.: coordination number; <sup>b</sup> R: bond distance; <sup>c</sup> σ<sup>2</sup>: Debye-Waller factor; <sup>d</sup> R-factor (%): if r < 5%, consistent with broadly correct models.

**Table S4.** EIS fitting parameters from equivalent circuits of NiCoV<sub>1.0</sub>-LDH/NF-100 composite during OER process.

| Potential<br>(V vs. RHE) | Impedimetric parameters (1 M KOH) |                                         |                                                          |        |                                          |
|--------------------------|-----------------------------------|-----------------------------------------|----------------------------------------------------------|--------|------------------------------------------|
|                          | L<br>(H cm <sup>-2</sup> )        | R <sub>s</sub><br>(Ω cm <sup>-2</sup> ) | Q-Y <sub>o</sub><br>(S s <sup>n</sup> cm <sup>-2</sup> ) | Q-n    | R <sub>ct</sub><br>(Ω cm <sup>-2</sup> ) |
| 1.10 V                   | 8.789*10 <sup>-7</sup>            | 1.559                                   | 0.002403                                                 | 0.7584 | 3.760*10 <sup>-13</sup>                  |
| 1.20 V                   | 8.536*10 <sup>-7</sup>            | 1.667                                   | 0.0106                                                   | 0.769  | 8.098*10 <sup>-4</sup>                   |
| 1.30 V                   | 8.797*10 <sup>-7</sup>            | 1.597                                   | 0.02118                                                  | 0.7123 | 2.374*10 <sup>-4</sup>                   |
| 1.35 V                   | 9.342*10 <sup>-7</sup>            | 1.556                                   | 0.9751                                                   | 0.7456 | 2.374*10 <sup>-8</sup>                   |
| 1.40 V                   | 8.925*10 <sup>-7</sup>            | 1.634                                   | 0.6173                                                   | 0.6295 | 1.296*10 <sup>-10</sup>                  |
| 1.45 V                   | 9.176*10 <sup>-7</sup>            | 1.577                                   | 0.7677                                                   | 0.7742 | 3.673*10 <sup>-8</sup>                   |
| 1.50 V                   | 9.261*10 <sup>-7</sup>            | 1.561                                   | 0.5455                                                   | 0.7235 | 22.56                                    |
| 1.55 V                   | 9.319*10 <sup>-7</sup>            | 1.546                                   | 0.4507                                                   | 0.6526 | 3.38                                     |
| 1.60 V                   | 9.335*10 <sup>-7</sup>            | 1.542                                   | 0.4188                                                   | 0.6332 | 0.7115                                   |
| 1.65 V                   | 9.305*10 <sup>-7</sup>            | 1.538                                   | 0.3698                                                   | 0.6276 | 0.3722                                   |

**Table S5.** EIS fitting parameters from equivalent circuits of NiCoV<sub>1.0</sub>-LDH/NF-100 composite during UOR process.

| Potential<br>(V vs. RHE) | Impedimetric parameters (1 M KOH + 0.33 M Urea) |                                         |                                                          |        |                                          |
|--------------------------|-------------------------------------------------|-----------------------------------------|----------------------------------------------------------|--------|------------------------------------------|
|                          | L<br>(H cm <sup>-2</sup> )                      | R <sub>s</sub><br>(Ω cm <sup>-2</sup> ) | Q-Y <sub>o</sub><br>(S s <sup>n</sup> cm <sup>-2</sup> ) | Q-n    | R <sub>ct</sub><br>(Ω cm <sup>-2</sup> ) |
| 1.10 V                   | 8.622*10 <sup>-7</sup>                          | 1.583                                   | 0.001496                                                 | 0.8101 | 3.231*10 <sup>-13</sup>                  |
| 1.20 V                   | 8.789*10 <sup>-7</sup>                          | 1.559                                   | 0.002403                                                 | 0.7584 | 3.76*10 <sup>-13</sup>                   |
| 1.25V                    | 8.712*10 <sup>-7</sup>                          | 1.569                                   | 0.004329                                                 | 0.7219 | 1.616*10 <sup>-17</sup>                  |
| 1.30V                    | 8.604*10 <sup>-7</sup>                          | 1.585                                   | 0.008196                                                 | 0.6966 | 1.812*10 <sup>-17</sup>                  |
| 1.35 V                   | 8.635*10 <sup>-7</sup>                          | 1.578                                   | 0.01693                                                  | 0.6667 | 18.680                                   |
| 1.40 V                   | 8.550*10 <sup>-7</sup>                          | 1.607                                   | 0.2987                                                   | 0.7167 | 8.817                                    |
| 1.45 V                   | 9.211*10 <sup>-7</sup>                          | 1.536                                   | 0.3887                                                   | 0.7163 | 1.770                                    |
| 1.50 V                   | 9.307*10 <sup>-7</sup>                          | 1.517                                   | 0.4426                                                   | 0.6335 | 1.118                                    |
| 1.55 V                   | 9.284*10 <sup>-7</sup>                          | 1.512                                   | 0.4342                                                   | 0.6087 | 0.9495                                   |
| 1.60 V                   | 9.335*10 <sup>-7</sup>                          | 1.515                                   | 0.4585                                                   | 0.5974 | 0.9172                                   |
| 1.65 V                   | 9.344*10 <sup>-7</sup>                          | 1.507                                   | 0.5619                                                   | 0.5326 | 1.270                                    |

**Table S6.** EIS fitting parameters from equivalent circuits of NiCoV<sub>1.0</sub>-LDH/NF- $\gamma$  ( $\gamma = 50, 100, 200$ ), NiCoV<sub>1.0</sub>-LDH/NF, NiCo-LDH/NF and NF during UOR process at 1.45 V.

| Electrocatalysts                 | Impedimetric parameters (1 M KOH + 0.33 M Urea) |                                                 |                                                          |        |                                                  |
|----------------------------------|-------------------------------------------------|-------------------------------------------------|----------------------------------------------------------|--------|--------------------------------------------------|
|                                  | L (H cm <sup>-2</sup> )                         | R <sub>s</sub><br>( $\Omega$ cm <sup>-2</sup> ) | Q-Y <sub>o</sub><br>(S s <sup>n</sup> cm <sup>-2</sup> ) | Q-n    | R <sub>ct</sub><br>( $\Omega$ cm <sup>-2</sup> ) |
| NiCoV <sub>1.0</sub> -LDH/NF-50  | 1.042*10 <sup>-6</sup>                          | 1.382                                           | 0.1950                                                   | 0.8037 | 3.071                                            |
| NiCoV <sub>1.0</sub> -LDH/NF-100 | 9.211*10 <sup>-7</sup>                          | 1.536                                           | 0.3887                                                   | 0.7163 | 1.770                                            |
| NiCoV <sub>1.0</sub> -LDH/NF-200 | 1.048*10 <sup>-6</sup>                          | 1.389                                           | 0.1870                                                   | 0.7920 | 5.193                                            |
| NiCoV <sub>1.0</sub> -LDH/NF     | 1.047*10 <sup>-6</sup>                          | 1.391                                           | 0.1965                                                   | 0.7894 | 5.795                                            |
| NiCo-LDH/NF                      | 1.046*10 <sup>-6</sup>                          | 1.389                                           | 0.2001                                                   | 0.7900 | 7.681                                            |
| NF                               | 1.051*10 <sup>-6</sup>                          | 1.382                                           | 0.2192                                                   | 0.7891 | 10.490                                           |

**Table S7.** The Ni<sup>3+</sup>/Ni<sup>2+</sup> and Co<sup>3+</sup>/Co<sup>2+</sup> ratio of the NiCoV<sub>1.0</sub>-LDH/NF-100 composite before and after the UOR reaction.

| Samples   | Ni 2p <sub>3/2</sub> /eV |                         | Ni 2p <sub>1/2</sub> /eV |                         | Ni <sup>3+</sup> /Ni <sup>2+</sup><br>ratio |
|-----------|--------------------------|-------------------------|--------------------------|-------------------------|---------------------------------------------|
|           | Ni <sup>3+</sup> (area)  | Ni <sup>2+</sup> (area) | Ni <sup>3+</sup> (area)  | Ni <sup>2+</sup> (area) |                                             |
| Initial   | 857.47 (78540)           | 856.21 (77312)          | 875.98 (31719)           | 874.05 (50774)          | 0.41                                        |
| After UOR | 856.63 (38930)           | 855.25 (22086)          | 874.55 (15094)           | 874.05 (13050)          | 1.76                                        |
| Samples   | Co 2p <sub>3/2</sub> /eV |                         | Co 2p <sub>1/2</sub> /eV |                         | Co <sup>3+</sup> /Co <sup>2+</sup><br>ratio |
|           | Co <sup>3+</sup> (area)  | Co <sup>2+</sup> (area) | Co <sup>3+</sup> (area)  | Co <sup>2+</sup> (area) |                                             |
| Initial   | 781.70 (36394)           | 782.73 (29574)          | 797.11 (10995)           | 798.73 (8389)           | 1.13                                        |
| After UOR | 781.04 (7476)            | 782.23 (3413)           | 796.20 (2991)            | 797.49 (2016)           | 2.19                                        |

**Table S8.** The fitted parameters of the EIS data of NiCoV<sub>1.0</sub>-LDH/NF-100, NiCoV<sub>1.0</sub>-LDH/NF and NiCo-LDH/NF composites (1 M KOH).

| Catalysts                        | Potential<br>(V vs. RHE) | R <sub>s</sub> (Ω) | CPE (F S <sup>n-1</sup> ) | R <sub>ct</sub> (Ω) | C <sub>φ</sub> (F)    | R <sub>ion</sub> (Ω)   |
|----------------------------------|--------------------------|--------------------|---------------------------|---------------------|-----------------------|------------------------|
| NiCoV <sub>1.0</sub> -LDH/NF-100 | -0.05                    | 1.750              | 0.0003716                 | 4.686               | 0.001003              | 8.988                  |
|                                  | -0.10                    | 1.737              | 0.0003479                 | 3.154               | 0.0009297             | 4.347                  |
|                                  | -0.15                    | 1.728              | 0.0002777                 | 1.384               | 0.0005291             | 0.7081                 |
|                                  | -0.20                    | 1.733              | 0.0002939                 | 1.103               | 0.001573              | 0.1305                 |
|                                  | -0.25                    | 1.744              | 0.0003057                 | 0.7393              | 0.005761              | 0.01264                |
|                                  | -0.30                    | 1.746              | 0.0003202                 | 0.4364              | 3.65*10 <sup>-8</sup> | 2.476*10 <sup>-8</sup> |
| NiCoV <sub>1.0</sub> -LDH/NF     | -0.05                    | 1.647              | 0.0001092                 | 8.974               | 0.0003655             | 14.18                  |
|                                  | -0.10                    | 1.658              | 0.0005513                 | 6.135               | 0.001696              | 8.276                  |
|                                  | -0.15                    | 1.652              | 0.0003053                 | 3.782               | 0.0006576             | 5.106                  |
|                                  | -0.20                    | 1.606              | 0.0004089                 | 2.324               | 0.0006958             | 2.056                  |
|                                  | -0.25                    | 1.620              | 0.0003061                 | 1.327               | 0.0004959             | 1.172                  |
|                                  | -0.30                    | 1.610              | 0.0004193                 | 1.341               | 0.0009535             | 1.158*10 <sup>-6</sup> |
| NiCo-LDH/NF                      | -0.05                    | 1.610              | 0.0002124                 | 12.050              | 0.0007333             | 22.48                  |
|                                  | -0.10                    | 1.616              | 0.0002626                 | 7.370               | 0.001017              | 15.98                  |
|                                  | -0.15                    | 1.582              | 0.0003874                 | 4.474               | 0.001314              | 5.684                  |
|                                  | -0.20                    | 1.561              | 0.0003842                 | 2.552               | 0.001088              | 2.378                  |
|                                  | -0.25                    | 1.551              | 0.0003632                 | 1.523               | 0.000902              | 1.197                  |
|                                  | -0.30                    | 1.562              | 0.0004044                 | 1.499               | 0.0008086             | 4.435*10 <sup>-6</sup> |

**Table S9.** EIS fitting parameters from equivalent circuits of NiCoV<sub>1.0</sub>-LDH/rGO/NF-100, NiCoV<sub>1.0</sub>-LDH/NF-100, rGO/NF and NF during UOR process.

| Electrocatalysts                     | Impedimetric parameters (1 M KOH + 0.33 M urea) |                                         |                                                          |        |                                          |
|--------------------------------------|-------------------------------------------------|-----------------------------------------|----------------------------------------------------------|--------|------------------------------------------|
|                                      | L<br>(H cm <sup>-2</sup> )                      | R <sub>s</sub><br>(Ω cm <sup>-2</sup> ) | Q-Y <sub>o</sub><br>(S s <sup>n</sup> cm <sup>-2</sup> ) | Q-n    | R <sub>ct</sub><br>(Ω cm <sup>-2</sup> ) |
| NiCoV <sub>1.0</sub> -LDH/rGO/NF-100 | 1.128*10 <sup>-6</sup>                          | 1.574                                   | 0.1691                                                   | 0.5556 | 1.142                                    |
| NiCoV <sub>1.0</sub> -LDH/NF-100     | 9.211*10 <sup>-7</sup>                          | 1.536                                   | 0.3887                                                   | 0.7163 | 1.77                                     |
| rGO/NF                               | 9.668*10 <sup>-7</sup>                          | 1.491                                   | 0.0016                                                   | 0.84   | 10.93                                    |
| NF                                   | 1.051*10 <sup>-6</sup>                          | 1.382                                   | 0.2192                                                   | 0.7891 | 10.49                                    |

**Table S10.** Comparison of the electrocatalytic UOR activity (1.0 M KOH) between the NiCoV<sub>1.0</sub>-LDH/rGO/NF-100 composite and other catalysts.

| Catalysts                                 | [Urea]/M      | Performance/V @mA cm <sup>-2</sup> | Tafel slope/mV dec <sup>-1</sup> | Refs.            |
|-------------------------------------------|---------------|------------------------------------|----------------------------------|------------------|
| <b>NiCoV<sub>1.0</sub>-LDH/rGO/NF-100</b> | <b>0.33 M</b> | <b>1.33@10</b>                     | <b>32</b>                        | <b>This work</b> |
| <b>NiCoV<sub>1.0</sub>-LDH/NF-100</b>     | <b>0.33 M</b> | <b>1.35@10</b>                     | <b>34</b>                        |                  |
| FQD/CoNi LDH/NF                           | 0.5 M         | 1.36@10                            | 17                               | [5]              |
| NiMoV LDH/NF                              | 0.33 M        | 1.40@100                           | 24.29                            | [6]              |
| NiFeCo LDH/NF                             | 0.33 M        | 1.49@10                            | 31                               | [7]              |
| Co <sub>2</sub> (OH) <sub>3</sub> Cl-V-n  | 0.33 M        | 1.54@30                            | 135.3                            | [8]              |
| NiAl-LDHs/CFP                             | 0.33 M        | 1.42@10                            | 59.8                             | [9]              |
| Ni(OH) <sub>2</sub> @NF                   | 0.33 M        | 1.35@10                            | 24.37                            | [10]             |
| Rh/NiV-LDH                                | 0.33 M        | 1.33@10                            | 36                               | [11]             |
| V-Ni(OH) <sub>2</sub>                     | 0.33 M        | 1.33@10                            | 32.15                            | [12]             |
| Co, V co-doped NiS <sub>2</sub>           | 0.33 M        | 1.35@10                            | 30.31                            | [13]             |
| Ni/FeOOH                                  | 0.5 M         | 1.37@10                            | 26                               | [14]             |
| Ni-Mo nanotube                            | 0.1 M         | 1.43@10                            | 22                               | [15]             |
| CoMn/CoMn <sub>2</sub> O <sub>4</sub>     | 0.5 M         | 1.51@100                           | 38                               | [16]             |
| NF/NiMoO-Ar                               | 0.5 M         | 1.37@10                            | 19                               | [17]             |
| Ni-S-Se/NF                                | 0.5 M         | 1.38@10                            | 28                               | [18]             |
| O-NiMoP/NF                                | 0.5 M         | 1.41@100                           | 34                               | [19]             |

**Table S11.** Comparison of the electrocatalytic HER activity between the NiCoV<sub>1.0</sub>-LDH/rGO/NF-100 composite and other recently reported catalysts.

| Electrocatalysts                                            | Substrate      | Method                             | HER/mV                             | Ref.             |
|-------------------------------------------------------------|----------------|------------------------------------|------------------------------------|------------------|
| <b>NiCoV<sub>1.0</sub>-LDH/rGO/NF-100</b>                   | <b>Ni foam</b> | <b>hydrothermal</b>                | <b>70 (<math>\eta_{10}</math>)</b> | <b>This work</b> |
| <b>NiCoV<sub>1.0</sub>-LDH/NF-100</b>                       | <b>Ni foam</b> | <b>hydrothermal</b>                | <b>80 (<math>\eta_{10}</math>)</b> |                  |
| Co <sub>3</sub> Fe <sub>1</sub> -LDH/rGO/NF                 | Ni foam        | co-precipitation                   | 110 ( $\eta_{10}$ )                | [1]              |
| Ni <sub>2</sub> Fe <sub>1</sub> -LDH/rGO/NF                 | Ni foam        | hydrothermal                       | 109 ( $\eta_{10}$ )                | [2]              |
| Ni <sub>6</sub> Fe <sub>1</sub> Mo <sub>1</sub> -LDH/rGO/NF | Ni foam        | hydrothermal                       | 90 ( $\eta_{10}$ )                 | [3]              |
| FQD/CoNi-LDH/NF                                             | Ni foam        | hydrothermal                       | 150 ( $\eta_{10}$ )                | [5]              |
| NiFeCo LDH/NF                                               | Ni foam        | electrodeposition                  | 108 ( $\eta_{10}$ )                | [7]              |
| NiCo LDH-V <sub>Ni</sub> /CC                                | Carbon cloth   | hydrothermal and chemical etching  | 195 ( $\eta_{10}$ )                | [20]             |
| NiMoCo-LDH                                                  | Ni foam        | hydrothermal                       | 123 ( $\eta_{10}$ )                | [21]             |
| 0.8 GO-FeNi-LDH                                             | Ni foam        | electrodeposition                  | 119 ( $\eta_{10}$ )                | [22]             |
| in-NiV-LDH/NF                                               | Ni foam        | hydrothermal                       | 114 ( $\eta_{10}$ )                | [23]             |
| CoMoV LDH/NF                                                | Ni foam        | hydrothermal                       | 150 ( $\eta_{10}$ )                | [24]             |
| NiFeW/CP                                                    | Carbon paper   | electrodeposition                  | 115 ( $\eta_{10}$ )                | [25]             |
| NiCoMo-LDH                                                  | GCE            | hydrothermal                       | 93 ( $\eta_{10}$ )                 | [26]             |
| CoMo-LDH                                                    | Ni foam        | co-precipitation                   | 115 ( $\eta_{10}$ )                | [27]             |
| CoMo-LDH                                                    | GCE            | hydrothermal                       | 325 ( $\eta_{100}$ )               | [28]             |
| Ru/NiFe LDH-F/NF                                            | Ni foam        | hydrothermal                       | 115.6 ( $\eta_{10}$ )              | [29]             |
| NiFe-LDH@CoS <sub>x</sub> /NF                               | Ni foam        | hydrothermal and electrodeposition | 143 ( $\eta_{10}$ )                | [30]             |

## References

- [1] J. Guo, Z. Wei, K. Wang, H. Zhang, *Int. J. Hydrogen Energy* 2021, 46, 27529.
- [2] K. Wang, J. Guo, H. Zhang, *Mater. Adv.* 2022, 3, 6887.
- [3] J. Guo, K. Wang, H. Zhang, H. Zhang, *ACS Appl. Nano Mater.* 2023, 6, 379.
- [4] T. Brezesinski, J. Wang, J. Polleux, B. Dunn, S. H. Tolbert, *J. Am. Chem. Soc.* 2009, 131, 1802.
- [5] Y. Feng, X. Wang, J. Huang, P. Dong, J. Ji, J. Li, L. Cao, L. Feng, P. Jin, C. Wang, *Chem. Eng. J.* 2020, 390, 124525.
- [6] Z. Wang, W. Liu, J. Bao, Y. Song, X. She, Y. Hua, G. Lv, J. Yuan, H. Li, H. Xu, *Chem. Eng. J.* 2022, 430, 133100.
- [7] P. Babar, A. Lokhande, V. Karade, B. Pawar, M. G. Gang, S. Pawar, J. H. Kim, *ACS Sustainable Chem. Eng.* 2019, 7, 10035.
- [8] B. Zhang, C. Pan, H. Liu, X. Wu, H. Jiang, L. Yang, Z. Qi, G. Li, L. Shan, Y. Lin, L. Song, Y. Jiang, *Chem. Eng. J.* 2022, 439, 135768.
- [9] Y. Wang, Y. Liu, M. Zhang, B. Liu, Z. Zhao, K. Yan, *Sci. China Mater.* 2022, 65, 1805.
- [10] L. Xia, Y. Liao, Y. Qing, H. Xu, Z. Gao, W. Li, Y. Wu, *ACS Appl. Mater. Interfaces* 2020, 3, 2996.
- [11] H. Sun, L. Li, H. C. Chen, D. Duan, M. Humayun, Y. Qiu, X. Zhang, X. Ao, Y. Wu, Y. Pang, K. Huo, C. Wang, Y. Xiong, *Sci. Bull.* 2022, 67, 1763.
- [12] Q. Cao, Y. Yuan, K. Wang, W. Huang, Y. Zhao, X. Sun, R. Ding, W. Lin, E. Liu, P. Gao, *J. Colloid Interface Sci.* 2022, 618, 411.
- [13] Z. Ji, Y. Song, S. Zhao, Y. Li, J. Liu, W. Hu, *ACS Catal.* 2022, 12, 569.
- [14] J.-J. Zhang, W.-W. Bao, M.-Y. Li, C.-M. Yang, N.-N. Zhang, *Chem. Commun.* 2020, 56, 14713.
- [15] J.-Y. Zhang, T. He, M. Wang, R. Qi, Y. Yan, Z. Dong, H. Liu, H. Wang, B. Y. Xia, *Nano Energy* 2019, 60, 894.
- [16] C. Wang, H. Lu, Z. Mao, C. Yan, G. Shen, X. Wang, *Adv. Funct. Mater.* 2020, 30, 2000556.
- [17] Z.-Y. Yu, C.-C. Lang, M.-R. Gao, Y. Chen, Q.-Q. Fu, Y. Duan, S.-H. Yu, *Energy Environ. Sci.* 2018, 11, 1890.
- [18] N. Chen, Y.-X. Du, G. Zhang, W.-T. Lu, F.-F. Cao, *Nano Energy* 2021, 81, 105605.
- [19] H. Jiang, M. Sun, S. Wu, B. Huang, C.-S. Lee, W. Zhang, *Adv. Funct. Mater.* 2021, 31, 2104951.
- [20] W. He, D. Cao, D. Ma, Y. Li, C. Chen, L. Liang, H. Liu, *Chem. Commun.* 2022, 58, 7757.
- [21] H. Liu, D. Zhao, Y. Liu, Y. Tong, X. Wu, G. Shen, *Sci. China Mater.* 2021, 64, 581.
- [22] X. Han, N. Suo, C. Chen, Z. Lin, Z. Dou, X. He, L. Cui, *Int. J. Hydrogen Energy* 2019, 44, 29876.
- [23] D. He, L. Cao, J. Huang, K. Kajiyoshi, J. Wu, C. Wang, Q. Liu, D. Yang, L. Feng, *J. Energy Chem.* 2020, 47, 263.
- [24] J. Bao, Z. Wang, J. Xie, L. Xu, F. Lei, M. Guan, Y. Zhao, Y. Huang, H. Li, *Chem. Commun.* 2019, 55, 3521.
- [25] L. Ding, K. Li, Z. Xie, G. Yang, S. Yu, W. Wang, H. Yu, J. Baxter, H. M. Meyer, D. A. Cullen, F.-Y. Zhang, *ACS Appl. Mater. Interfaces* 2021, 13, 20070.
- [26] S. M. N. Jeghan, N. Kim, G. Lee, *Int. J. Hydrogen Energy* 2021, 46, 22463.
- [27] J. Bao, Z. Wang, J. Xie, L. Xu, F. Lei, M. Guan, Y. Huang, Y. Zhao, J. Xia, H. Li, *Inorg. Chem. Front.* 2018, 5, 2964.
- [28] S. M. N. Jeghan, J. Kim, G. Lee, *Appl. Surf. Sci.* 2021, 546, 149072.
- [29] Y. Wang, P. Zheng, M. Li, Y. Li, X. Zhang, J. Chen, X. Fang, Y. Liu, X. Yuan, X. Dai, H. Wang, *Nanoscale* 2020, 12, 9669.
- [30] Y. Yang, Y. Xie, Z. Yu, S. Guo, M. Yuan, H. Yao, Z. Liang, Y. R. Lu, T.-S. Chan, C. Li, H. Dong, S. Ma, *Chem. Eng. J.* 2021, 419, 129512.
